# Supplementary material for: Application of magnetic deep eutectic solvents as an efficient catalyst in the synthesis of new 1,2,3-triazole-nicotinonitrile hybrids via a cooperative vinylogous anomeric-based oxidation
Source: Royal Society of Chemistry journal article supplement (doi:10.1039/d4ra05177g), 2024-01-01

**Application of magnetic deep eutectic solvent as an efficient catalyst in the synthesis of new 1,2,3-triazole-nicotinonitrile hybrids via a cooperative vinylogous anomeric based oxidation**

Monireh Navazeni, Mohammad Ali Zolfigol\*, Morteza Torabi, Ardashir Khazaei\*

Department of Organic Chemistry, Faculty of Chemistry and Petroleum Sciences, Bu-Ali Sina University, Hamedan, Iran

zolfi@basu.ac.ir; [mzolfigol@yahoo.com](mailto:mzolfigol@yahoo.com) (M.A. Zolfigol), [khazaeiardeshir@gmail.com](mailto:khazaeiardeshir@gmail.com) (A. Khazaei)

- 1: FT-IR spectrum of 1,1'-(naphthalene-1,5-diyl)bis(3-(3-(triethoxysilyl)propyl)urea)
- 2: <sup>1</sup>H NMR spectrum of 1,1'-(naphthalene-1,5-diyl)bis(3-(3-(triethoxysilyl)propyl)urea)
- 3: FT-IR spectrum of 2-amino-6-(5-methyl-1-(4-nitrophenyl)-1*H*-1,2,3-triazol-4-yl)-4-phenylnicotinonitrile
- 4: <sup>1</sup>H NMR spectrum of 2-amino-6-(5-methyl-1-(4-nitrophenyl)-1*H*-1,2,3-triazol-4-yl)-4-phenylnicotinonitrile
- 5: <sup>13</sup>C NMR spectrum of 2-amino-6-(5-methyl-1-(4-nitrophenyl)-1*H*-1,2,3-triazol-4-yl)-4-phenylnicotinonitrile
- 6: Mass spectrum of 2-amino-6-(5-methyl-1-(4-nitrophenyl)-1*H*-1,2,3-triazol-4-yl)-4-phenylnicotinonitrile
- 7: FT-IR spectrum of 2-amino-6-(5-methyl-1-(4-nitrophenyl)-1*H*-1,2,3-triazol-4-yl)-4-(*p*-tolyl) nicotinonitrile
- 8: <sup>1</sup>H NMR spectrum of 2-amino-6-(5-methyl-1-(4-nitrophenyl)-1*H*-1,2,3-triazol-4-yl)-4-(*p*-tolyl) nicotinonitrile
- 9: Mass spectrum of 2-amino-6-(5-methyl-1-(4-nitrophenyl)-1*H*-1,2,3-triazol-4-yl)-4-(*p*-tolyl) nicotinonitrile
- 10: FT-IR spectrum of 2-amino-6-(5-methyl-1-(4-nitrophenyl)-1*H*-1,2,3-triazol-4-yl)-4-(4-methoxyphenyl) nicotinonitrile

- 11: <sup>1</sup>H NMR spectrum of 2-amino-6-(5-methyl-1-(4-nitrophenyl)-1*H*-1,2,3-triazol-4-yl)-4-(4-methoxyphenyl) nicotinonitrile
- 12: <sup>13</sup>C NMR spectrum of 2-amino-6-(5-methyl-1-(4-nitrophenyl)-1*H*-1,2,3-triazol-4-yl)-4-(4-methoxyphenyl) nicotinonitrile
- 13: Mass spectrum of 2-amino-6-(5-methyl-1-(4-nitrophenyl)-1*H*-1,2,3-triazol-4-yl)-4-(4-methoxyphenyl) nicotinonitrile
- 14: FT-IR spectrum of 2-amino-6-(5-methyl-1-(4-nitrophenyl)-1*H*-1,2,3-triazol-4-yl)-4-(naphthalen-1-yl) nicotinonitrile
- 15: <sup>1</sup>H NMR spectrum of 2-amino-6-(5-methyl-1-(4-nitrophenyl)-1*H*-1,2,3-triazol-4-yl)-4-(naphthalen-1-yl) nicotinonitrile
- 16: <sup>13</sup>C NMR spectrum of 2-amino-6-(5-methyl-1-(4-nitrophenyl)-1*H*-1,2,3-triazol-4-yl)-4-(naphthalen-1-yl) nicotinonitrile
- 17: Mass spectrum of 2-amino-6-(5-methyl-1-(4-nitrophenyl)-1*H*-1,2,3-triazol-4-yl)-4-(naphthalen-1-yl) nicotinonitrile
- 18: FT-IR spectrum of 2-amino-4-(1*H*-indol-3-yl)-6-(5-methyl-1-(4-nitrophenyl)-1*H*-1,2,3-triazol-4-yl) nicotinonitrile
- 19: <sup>1</sup>H NMR spectrum of 2-amino-4-(1*H*-indol-3-yl)-6-(5-methyl-1-(4-nitrophenyl)-1*H*-1,2,3-triazol-4-yl) nicotinonitrile
- 20: <sup>13</sup>C NMR spectrum of 2-amino-4-(1*H*-indol-3-yl)-6-(5-methyl-1-(4-nitrophenyl)-1*H*-1,2,3-triazol-4-yl) nicotinonitrile
- 21: FT-IR spectrum of 2-amino-4-(4-chlorophenyl)-6-(5-methyl-1-(4-nitrophenyl)-1*H*-1,2,3-triazol-4-yl) nicotinonitrile
- 22: <sup>1</sup>H NMR spectrum of 2-amino-4-(4-chlorophenyl)-6-(5-methyl-1-(4-nitrophenyl)-1*H*-1,2,3-triazol-4-yl) nicotinonitrile
- 23: <sup>13</sup>C NMR spectrum of 2-amino-4-(4-chlorophenyl)-6-(5-methyl-1-(4-nitrophenyl)-1*H*-1,2,3-triazol-4-yl) nicotinonitrile
- 24: Mass spectrum of 2-amino-4-(4-chlorophenyl)-6-(5-methyl-1-(4-nitrophenyl)-1*H*-1,2,3-triazol-4-yl) nicotinonitrile
- 25: FT-IR spectrum of 2-amino-4-(4-bromophenyl)-6-(5-methyl-1-(4-nitrophenyl)-1*H*-1,2,3-triazol-4-yl) nicotinonitrile

- 26: <sup>1</sup>H NMR spectrum of 2-amino-4-(4-bromophenyl)-6-(5-methyl-1-(4-nitrophenyl)-1*H*-1,2,3-triazol-4-yl) nicotinonitrile
- 27: <sup>13</sup>C NMR spectrum of 2-amino-4-(4-bromophenyl)-6-(5-methyl-1-(4-nitrophenyl)-1*H*-1,2,3-triazol-4-yl) nicotinonitrile
- 28: Mass spectrum of 2-amino-4-(4-bromophenyl)-6-(5-methyl-1-(4-nitrophenyl)-1*H*-1,2,3-triazol-4-yl) nicotinonitrile
- 29: FT-IR spectrum of 2-amino-4-(3-bromophenyl)-6-(5-methyl-1-(4-nitrophenyl)-1*H*-1,2,3-triazol-4-yl) nicotinonitrile
- 30: <sup>1</sup>H NMR spectrum of 2-amino-4-(3-bromophenyl)-6-(5-methyl-1-(4-nitrophenyl)-1*H*-1,2,3-triazol-4-yl) nicotinonitrile
- 31: <sup>13</sup>C NMR spectrum of 2-amino-4-(3-bromophenyl)-6-(5-methyl-1-(4-nitrophenyl)-1*H*-1,2,3-triazol-4-yl) nicotinonitrile
- 32: Mass spectrum of 2-amino-4-(3-bromophenyl)-6-(5-methyl-1-(4-nitrophenyl)-1*H*-1,2,3-triazol-4-yl) nicotinonitrile
- 33: <sup>1</sup>H NMR spectrum of 2-amino-4-(4-chloro-3-nitrophenyl)-6-(5-methyl-1-(4-nitrophenyl)-1*H*-1,2,3-triazol-4-yl) nicotinonitrile
- 34: <sup>13</sup>C NMR spectrum of 2-amino-4-(4-chloro-3-nitrophenyl)-6-(5-methyl-1-(4-nitrophenyl)-1*H*-1,2,3-triazol-4-yl) nicotinonitrile
- 35: Mass spectrum of 2-amino-4-(4-chloro-3-nitrophenyl)-6-(5-methyl-1-(4-nitrophenyl)-1*H*-1,2,3-triazol-4-yl) nicotinonitrile
- 36: FT-IR spectrum of 2-amino-4-(4-florophenyl)-6-(5-methyl-1-(4-nitrophenyl)-1*H*-1,2,3-triazol-4-yl) nicotinonitrile
- 37: <sup>1</sup>H NMR spectrum of 2-amino-4-(4-florophenyl)-6-(5-methyl-1-(4-nitrophenyl)-1*H*-1,2,3-triazol-4-yl) nicotinonitrile
- 38: <sup>13</sup>C NMR spectrum of 2-amino-4-(4-florophenyl)-6-(5-methyl-1-(4-nitrophenyl)-1*H*-1,2,3-triazol-4-yl) nicotinonitrile

- 39: Mass spectrum of 2-amino-4-(4-florophenyl)-6-(5-methyl-1-(4-nitrophenyl)-1*H*-1,2,3-triazol-4-yl) nicotinonitrile
- 40: FT-IR spectrum of 2-amino-4-(2-florophenyl)-6-(5-methyl-1-(4-nitrophenyl)-1*H*-1,2,3-triazol-4-yl) nicotinonitrile
- 41: <sup>1</sup>H NMR spectrum of 2-amino-4-(2-florophenyl)-6-(5-methyl-1-(4-nitrophenyl)-1*H*-1,2,3-triazol-4-yl) nicotinonitrile
- 42: <sup>13</sup>C NMR spectrum of 2-amino-4-(2-florophenyl)-6-(5-methyl-1-(4-nitrophenyl)-1*H*-1,2,3-triazol-4-yl) nicotinonitrile
- 43: Mass spectrum of 2-amino-4-(2-florophenyl)-6-(5-methyl-1-(4-nitrophenyl)-1*H*-1,2,3-triazol-4-yl) nicotinonitrile
- 44: FT-IR spectrum of 2-amino-6-(5-methyl-1-(4-nitrophenyl)-1*H*-1,2,3-triazol-4-yl)-4-(4-nitrophenyl) nicotinonitrile
- 45: <sup>1</sup>H NMR spectrum of 2-amino-6-(5-methyl-1-(4-nitrophenyl)-1*H*-1,2,3-triazol-4-yl)-4-(4-nitrophenyl) nicotinonitrile
- 46: <sup>13</sup>C NMR spectrum of 2-amino-6-(5-methyl-1-(4-nitrophenyl)-1*H*-1,2,3-triazol-4-yl)-4-(4-nitrophenyl) nicotinonitrile
- 47: Mass spectrum of 2-amino-6-(5-methyl-1-(4-nitrophenyl)-1*H*-1,2,3-triazol-4-yl)-4-(4-nitrophenyl) nicotinonitrile
- 48: FT-IR spectrum of 2-amino-4-(4-cyanophenyl)-6-(5-methyl-1-(4-nitrophenyl)-1*H*-1,2,3-triazol-4-yl) nicotinonitrile
- 49: <sup>1</sup>H NMR spectrum of 2-amino-4-(4-cyanophenyl)-6-(5-methyl-1-(4-nitrophenyl)-1*H*-1,2,3-triazol-4-yl) nicotinonitrile
- 50: <sup>13</sup>C NMR spectrum of 2-amino-4-(4-cyanophenyl)-6-(5-methyl-1-(4-nitrophenyl)-1*H*-1,2,3-triazol-4-yl) nicotinonitrile
- 51: EDS signals of recovered Fe<sub>3</sub>O<sub>4</sub>@SiO<sub>2</sub>@DES1
- 52: Mapping analysis of recovered Fe<sub>3</sub>O<sub>4</sub>@SiO<sub>2</sub>@DES1
- 53: FESEM images of recovered Fe<sub>3</sub>O<sub>4</sub>@SiO<sub>2</sub>@DES1

54: XRD pattern of recovered  $\text{Fe}_3\text{O}_4@\text{SiO}_2@\text{DES1}$

55: The  $\text{N}_2$  adsorption-desorption isotherms of  $\text{Fe}_3\text{O}_4@\text{SiO}_2@\text{DES1}$  (a) and recovered  $\text{Fe}_3\text{O}_4@\text{SiO}_2@\text{DES1}$  (b)

1: FT-IR spectrum of 1,1'-(naphthalene-1,5-diyl)bis(3-(3-(triethoxysilyl)propyl)urea)

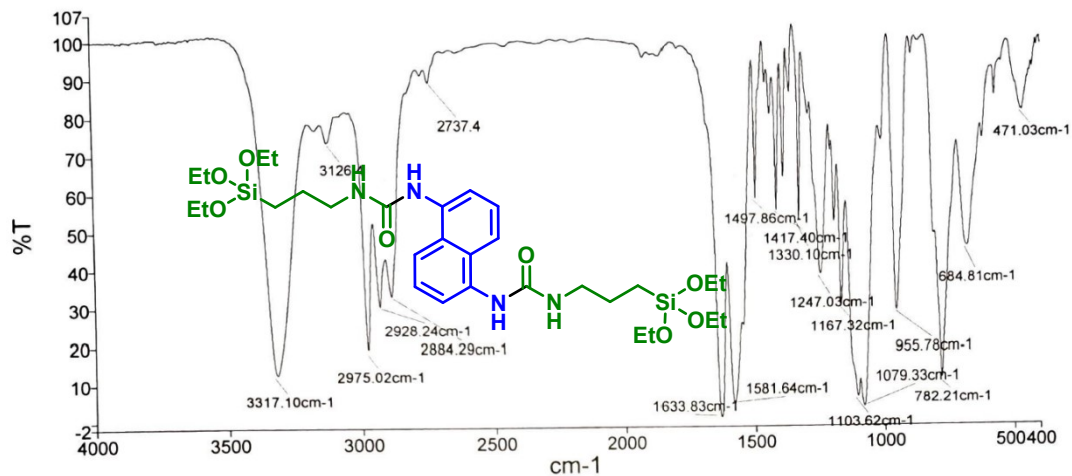

2:  $^1\text{H}$  NMR spectrum of 1,1'-(naphthalene-1,5-diyl)bis(3-(3-(triethoxysilyl)propyl)urea)

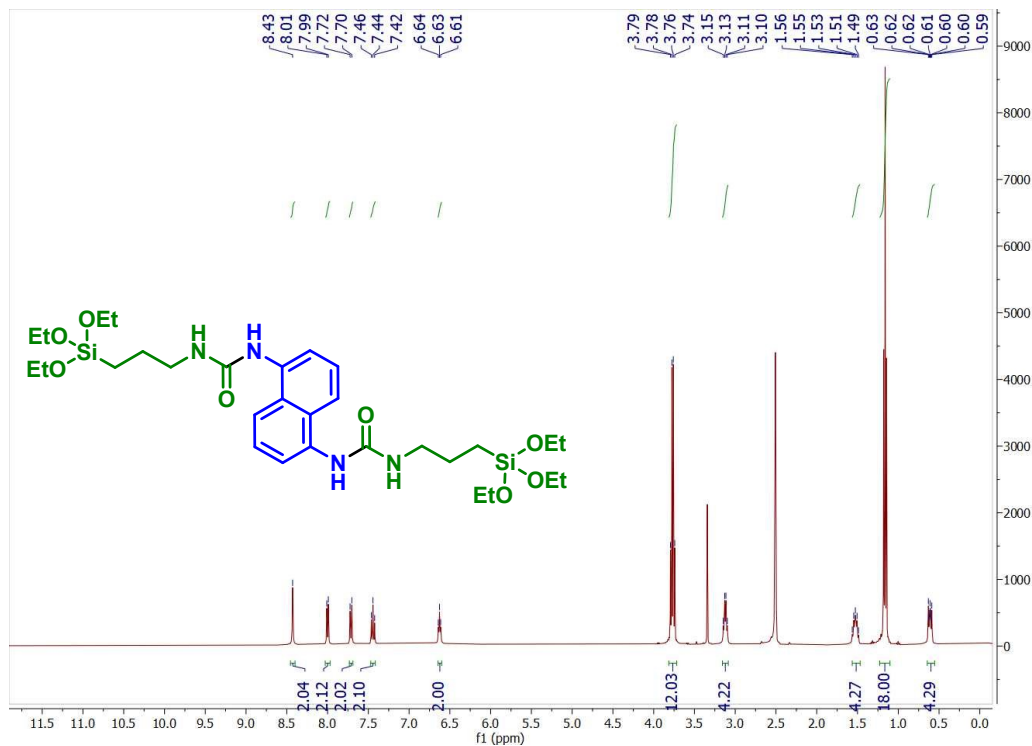

3: FT-IR spectrum of 2-amino-6-(5-methyl-1-(4-nitrophenyl)-1H-1,2,3-triazol-4-yl)-4-phenylnicotinonitrile

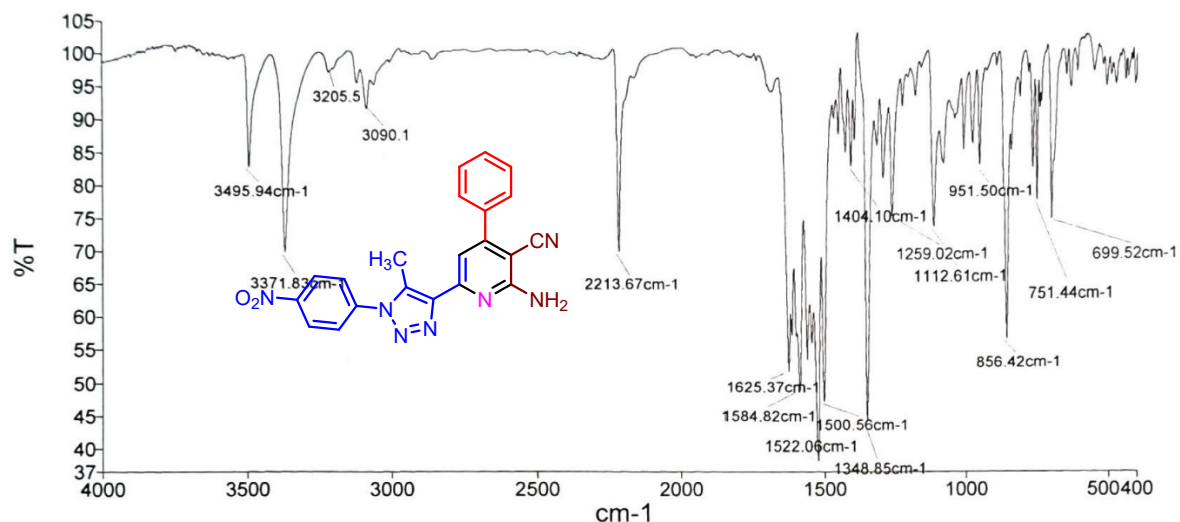

4: <sup>1</sup>H NMR spectrum of 2-amino-6-(5-methyl-1-(4-nitrophenyl)-1H-1,2,3-triazol-4-yl)-4-phenylnicotinonitrile

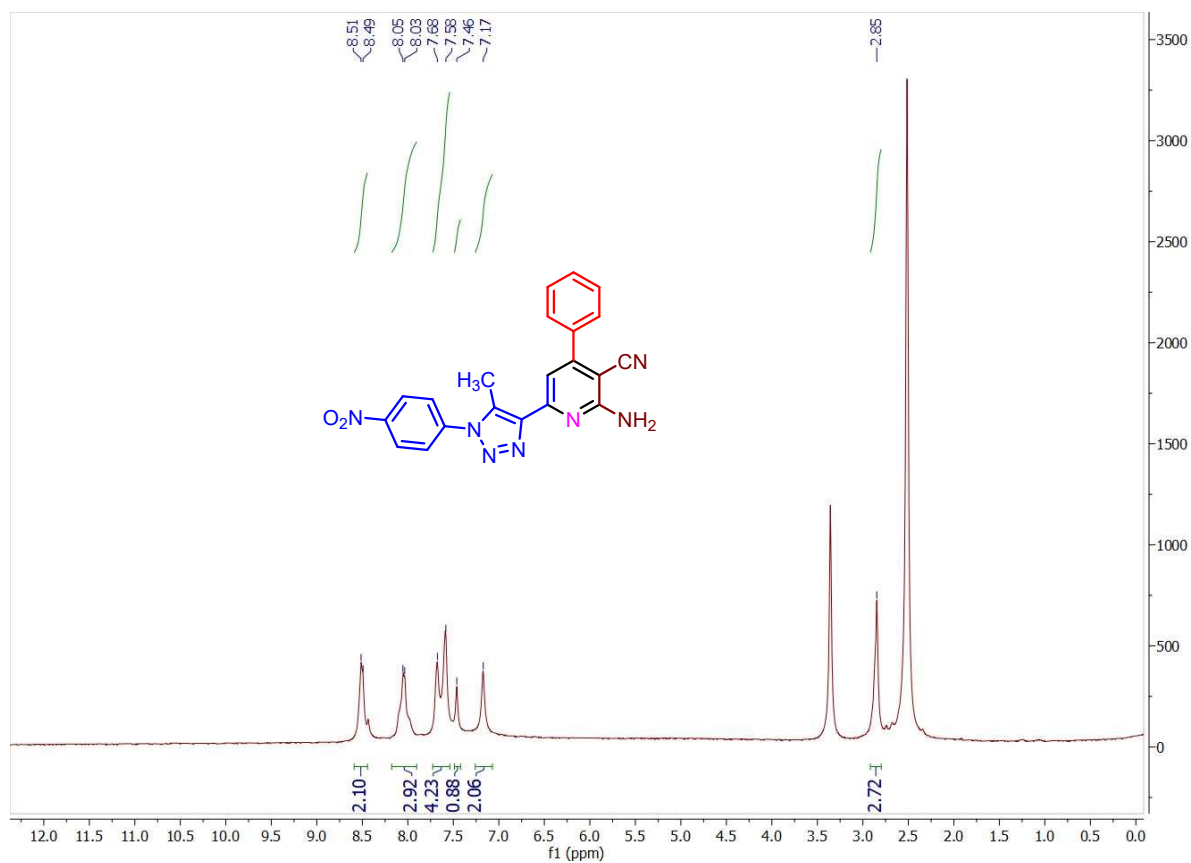

5:  $^{13}\text{C}$  NMR spectrum of 2-amino-6-(5-methyl-1-(4-nitrophenyl)-1H-1,2,3-triazol-4-yl)-4-phenylnicotinonitrile

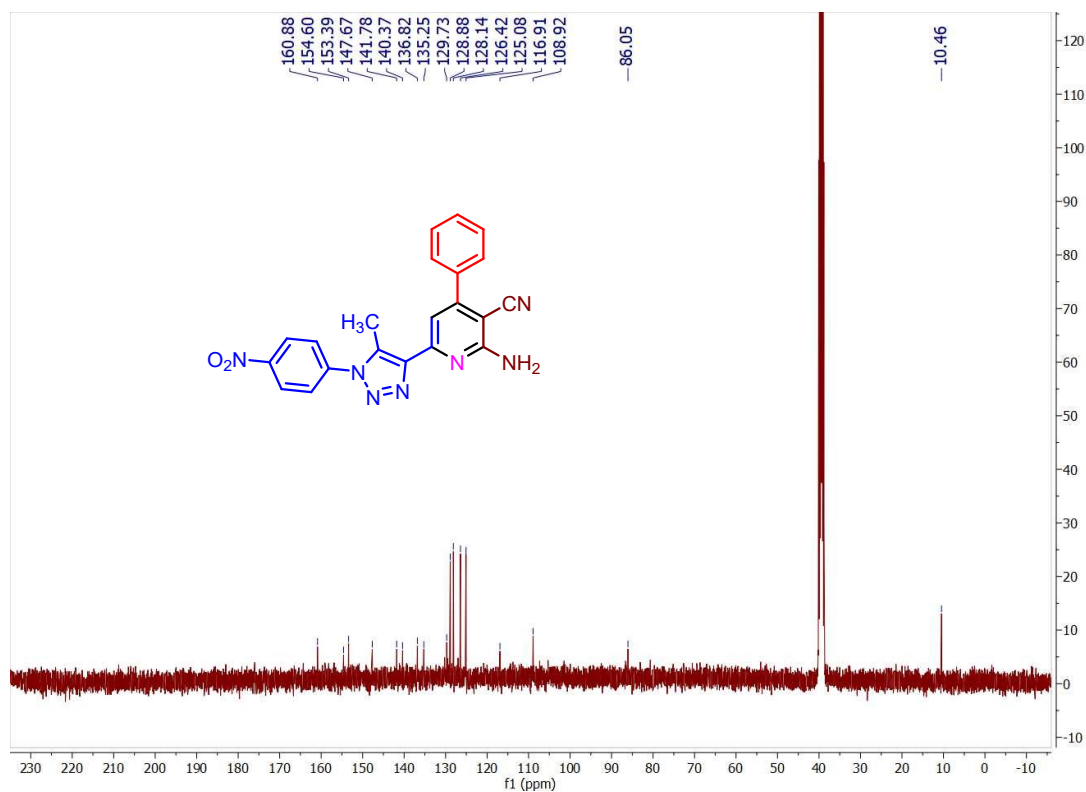

6: Mass spectrum of 2-amino-6-(5-methyl-1-(4-nitrophenyl)-1H-1,2,3-triazol-4-yl)-4-phenylnicotinonitrile

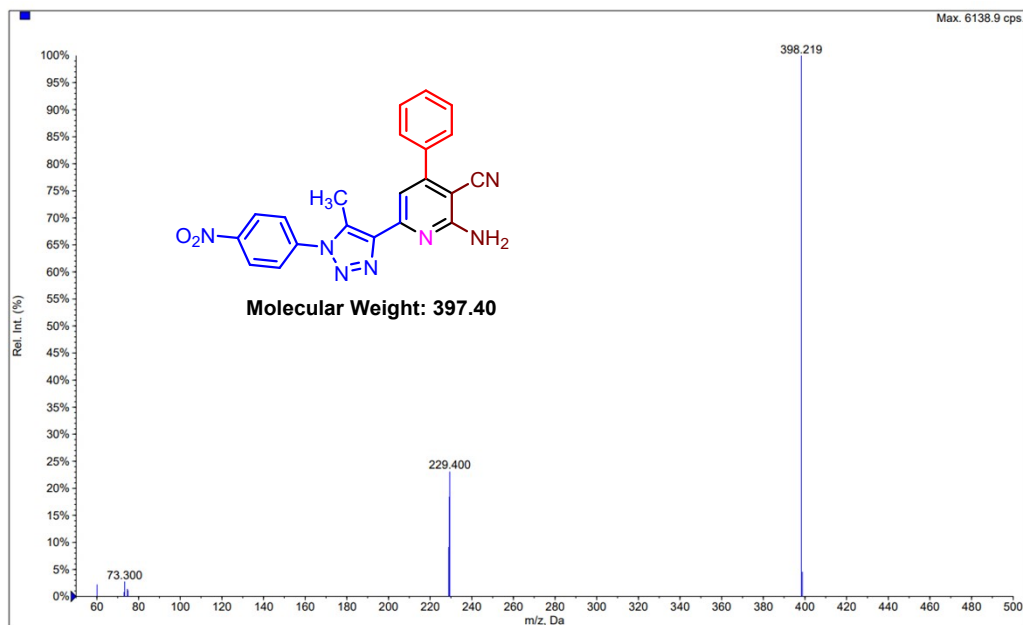

7: FT-IR spectrum of 2-amino-6-(5-methyl-1-(4-nitrophenyl)-1H-1,2,3-triazol-4-yl)-4-(*p*-tolyl) nicotinonitrile

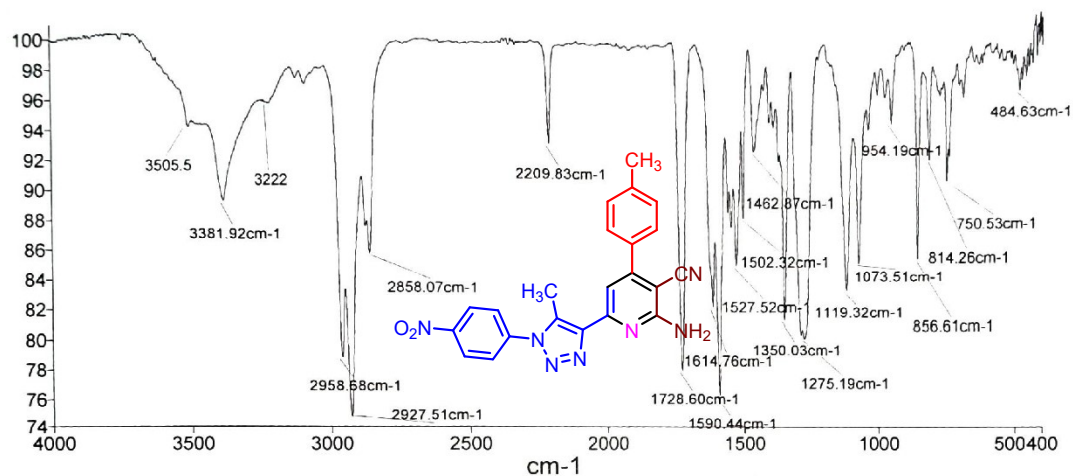

8: <sup>1</sup>H NMR spectrum of 2-amino-6-(5-methyl-1-(4-nitrophenyl)-1H-1,2,3-triazol-4-yl)-4-(*p*-tolyl) nicotinonitrile

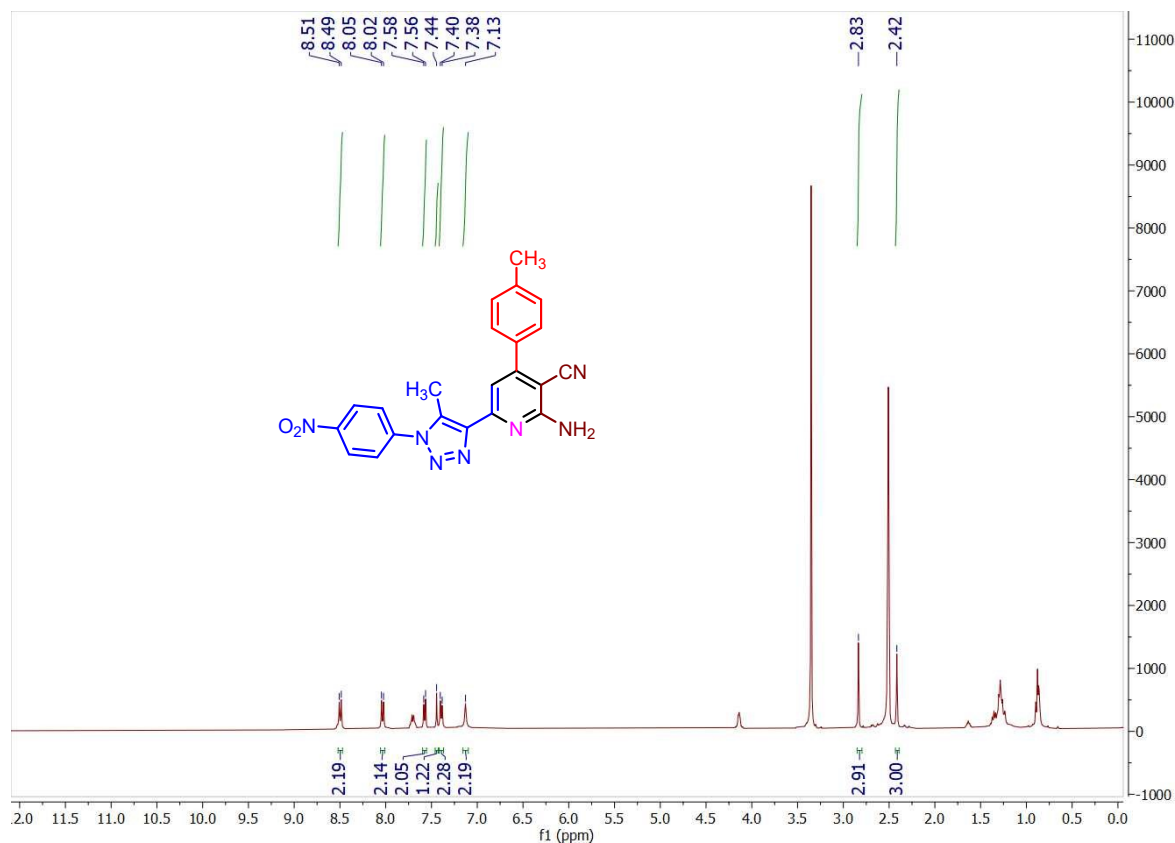



9: Mass spectrum of 2-amino-6-(5-methyl-1-(4-nitrophenyl)-1H-1,2,3-triazol-4-yl)-4-(*p*-tolyl) nicotinonitrile

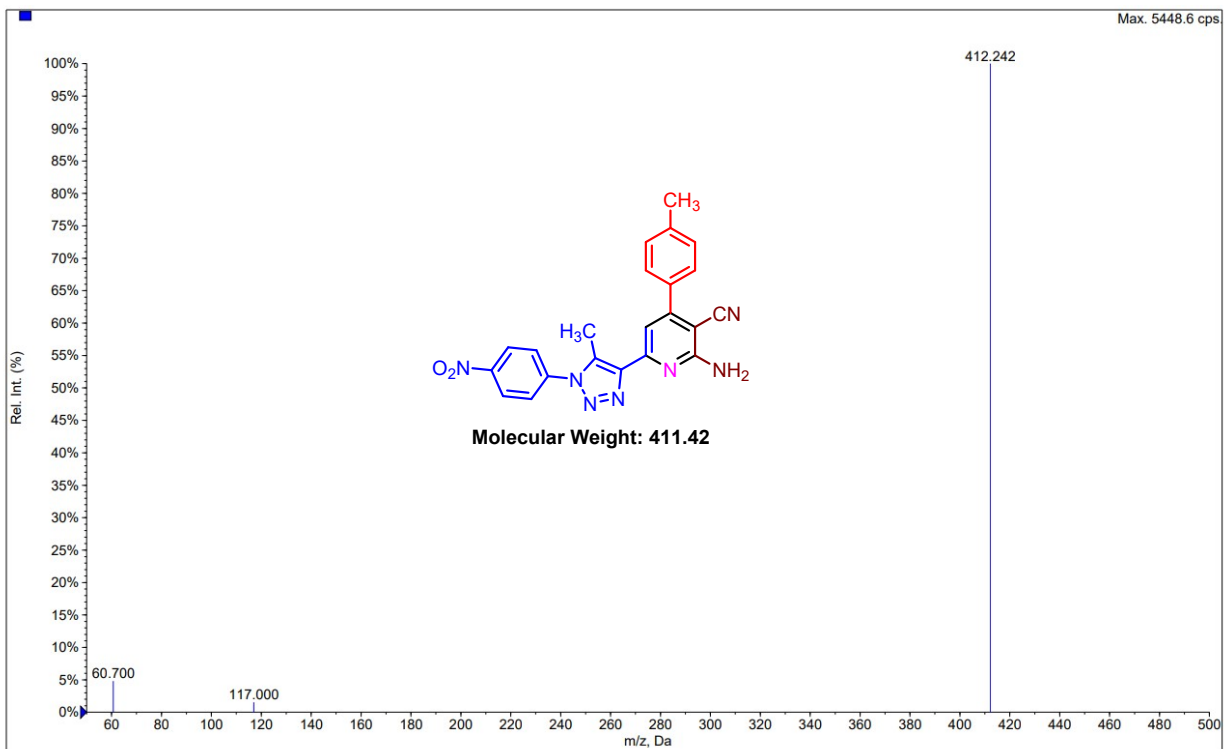

10: FT-IR spectrum of 2-amino-6-(5-methyl-1-(4-nitrophenyl)-1H-1,2,3-triazol-4-yl)-4-(4-methoxyphenyl) nicotinonitrile

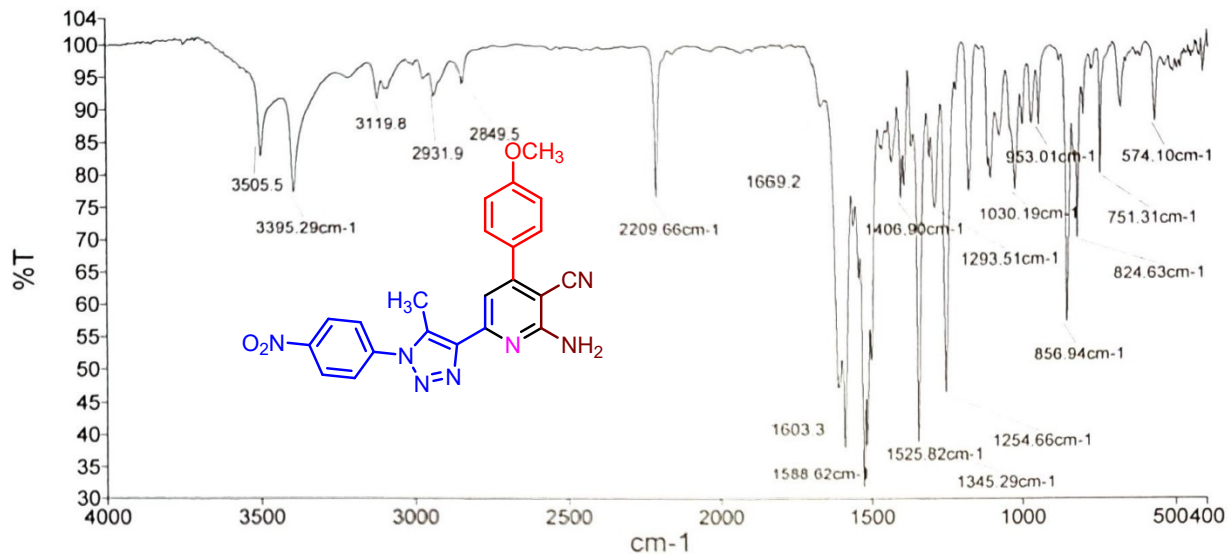

11:  $^1\text{H}$  NMR spectrum of 2-amino-6-(5-methyl-1-(4-nitrophenyl)-1*H*-1,2,3-triazol-4-yl)-4-(4-methoxyphenyl) nicotinonitrile

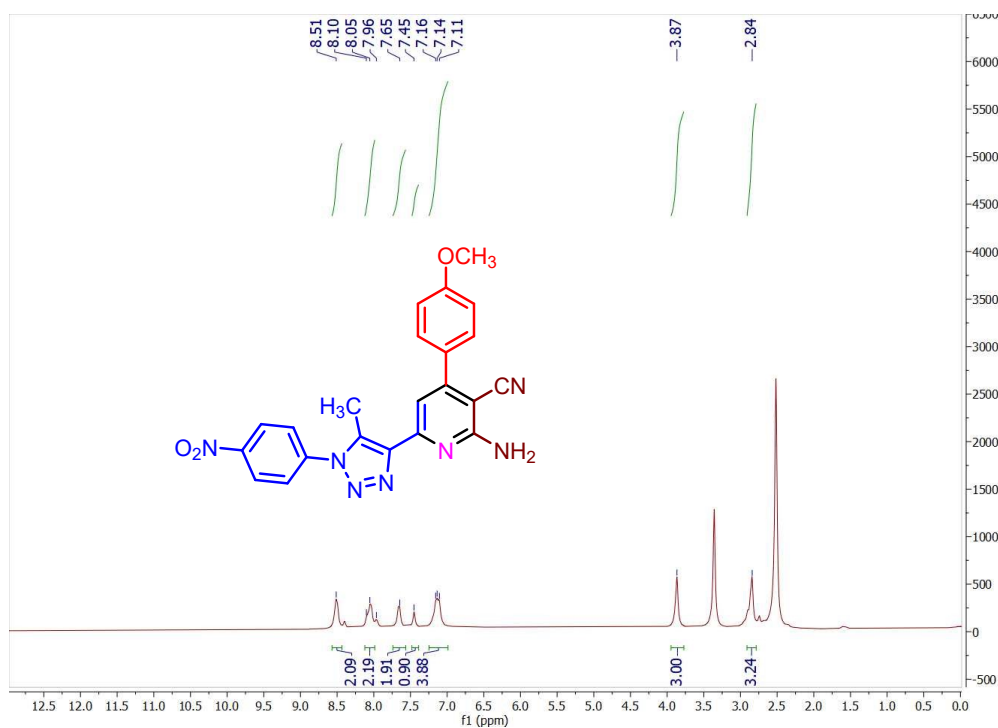

12:  $^{13}\text{C}$  NMR spectrum of 2-amino-6-(5-methyl-1-(4-nitrophenyl)-1*H*-1,2,3-triazol-4-yl)-4-(4-methoxyphenyl) nicotinonitrile

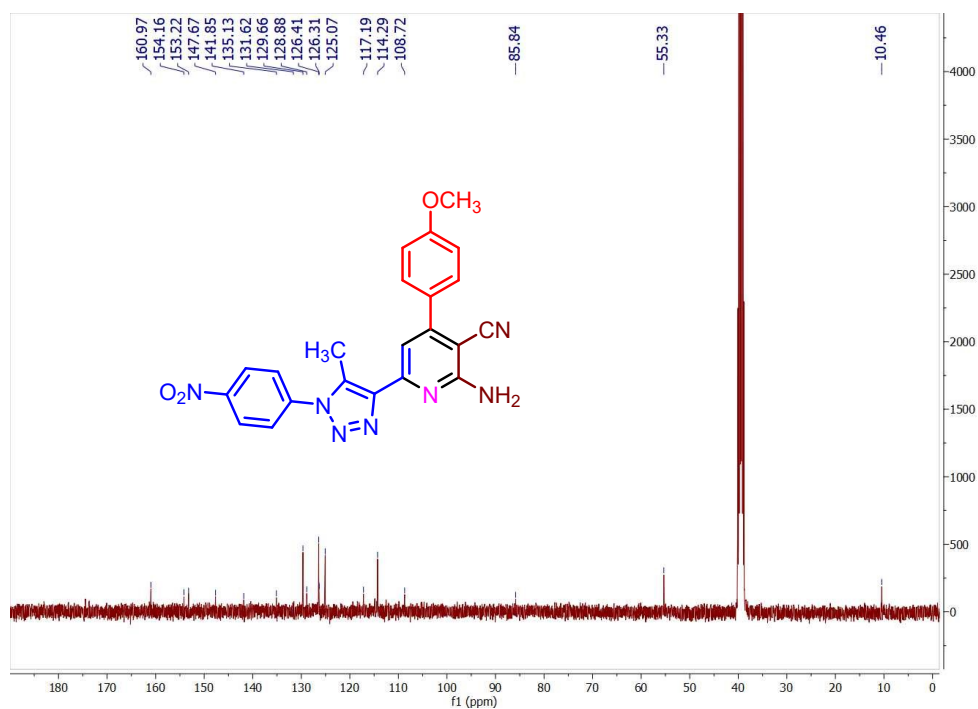

13: Mass spectrum of 2-amino-6-(5-methyl-1-(4-nitrophenyl)-1H-1,2,3-triazol-4-yl)-4-(4-methoxyphenyl) nicotinonitrile

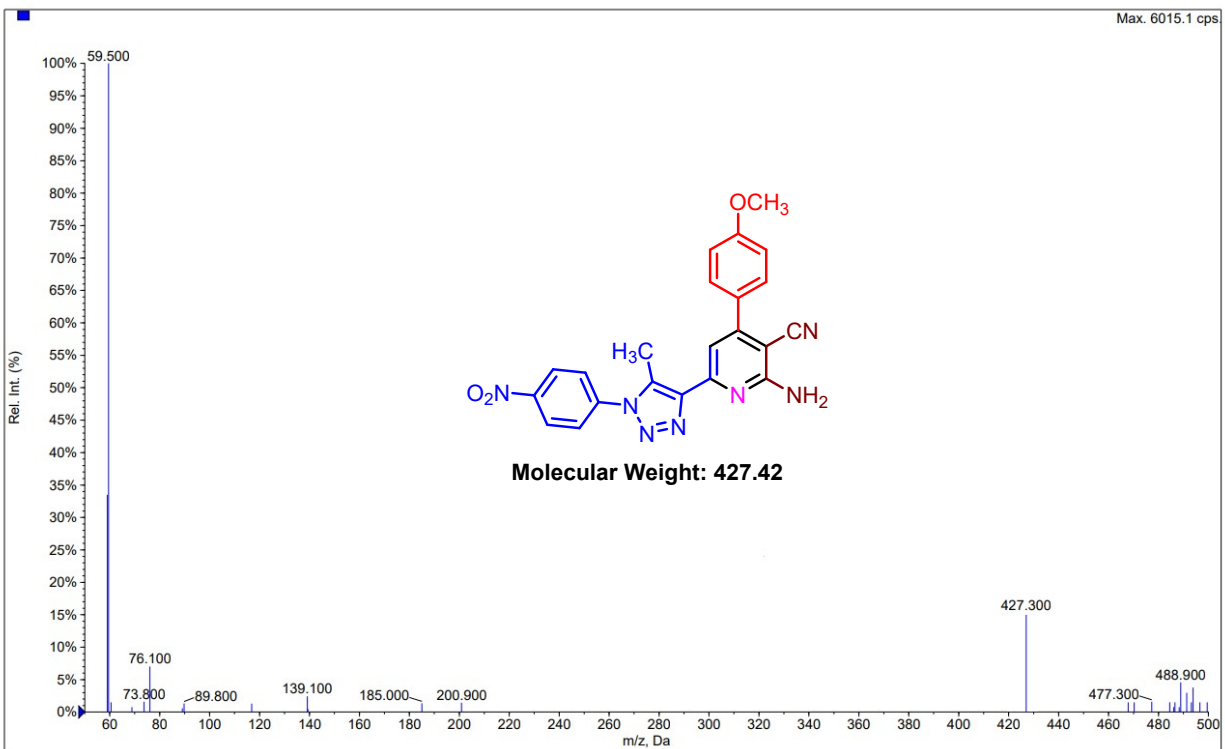

14: FT-IR spectrum of 2-amino-6-(5-methyl-1-(4-nitrophenyl)-1H-1,2,3-triazol-4-yl)-4-(naphthalen-1-yl) nicotinonitrile

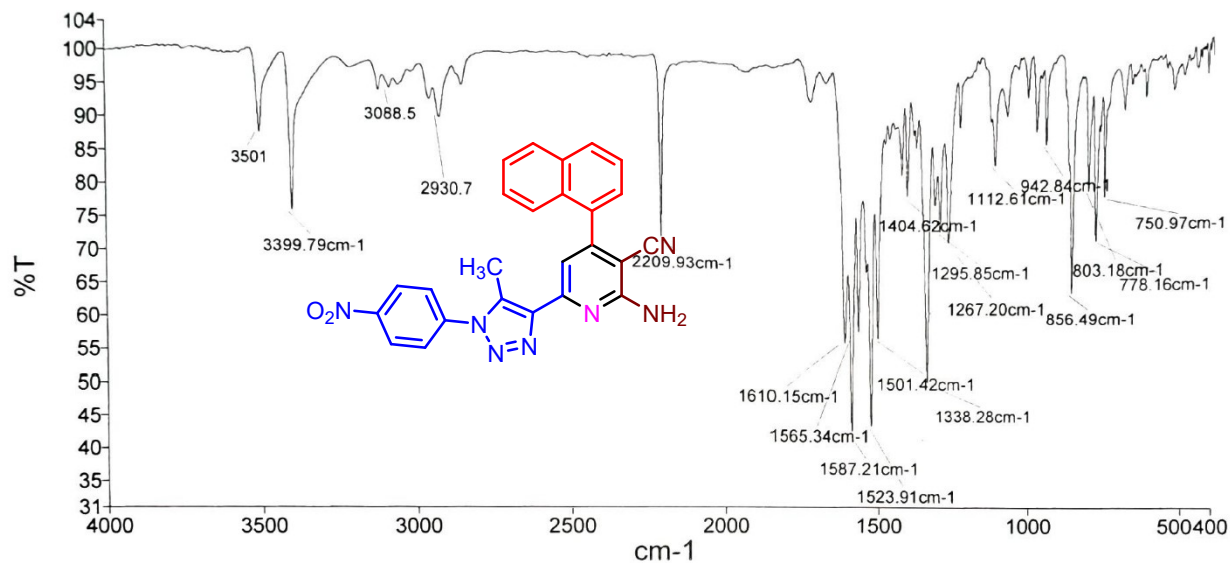

15:  $^1\text{H}$  NMR spectrum of 2-amino-6-(5-methyl-1-(4-nitrophenyl)-1*H*-1,2,3-triazol-4-yl)-4-(naphthalen-1-yl) nicotinonitrile

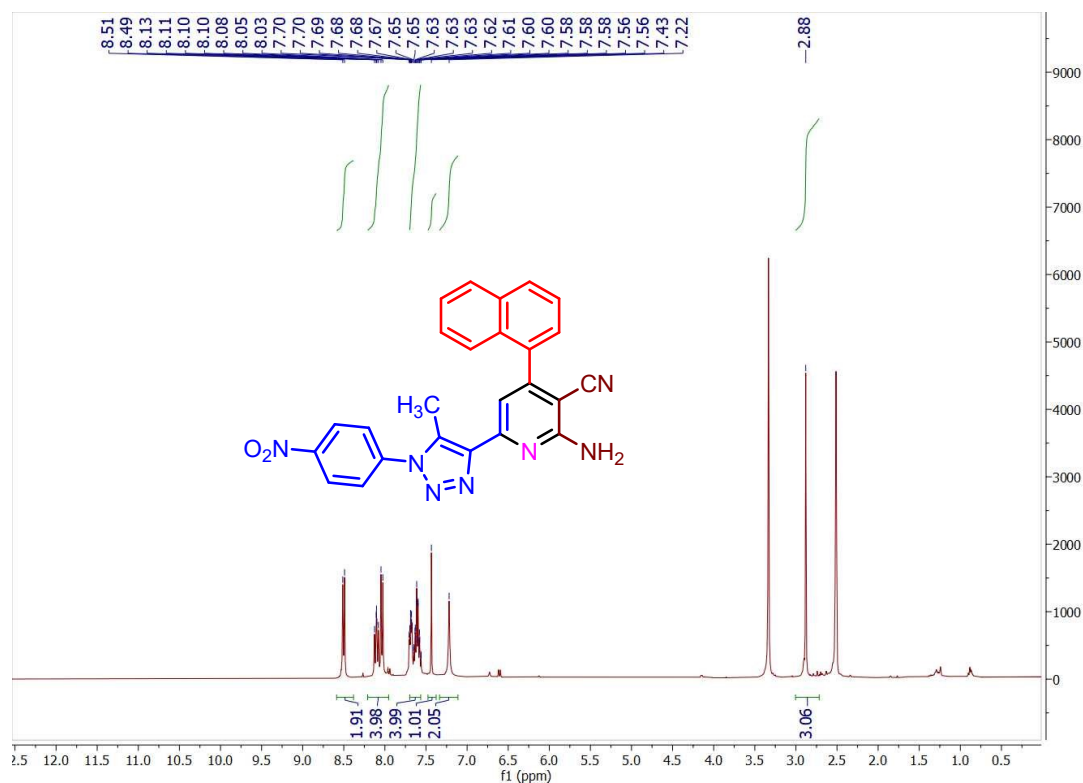

16:  $^{13}\text{C}$  NMR spectrum of 2-amino-6-(5-methyl-1-(4-nitrophenyl)-1*H*-1,2,3-triazol-4-yl)-4-(naphthalen-1-yl) nicotinonitrile

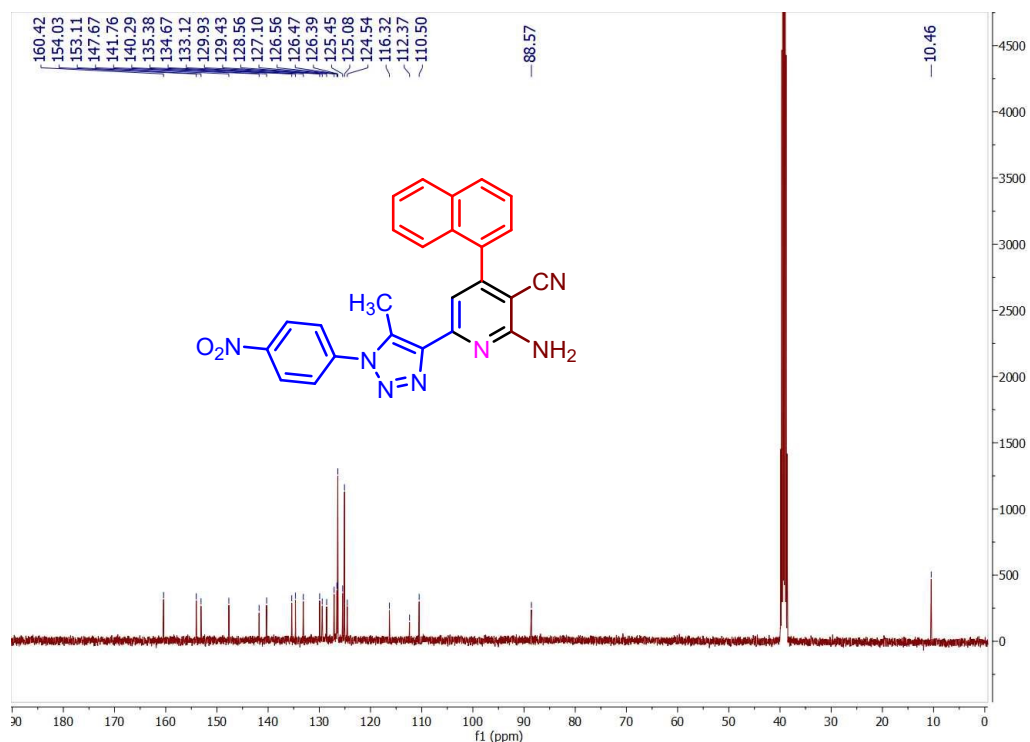

17: Mass spectrum of 2-amino-6-(5-methyl-1-(4-nitrophenyl)-1H-1,2,3-triazol-4-yl)-4-(naphthalen-1-yl) nicotinonitrile

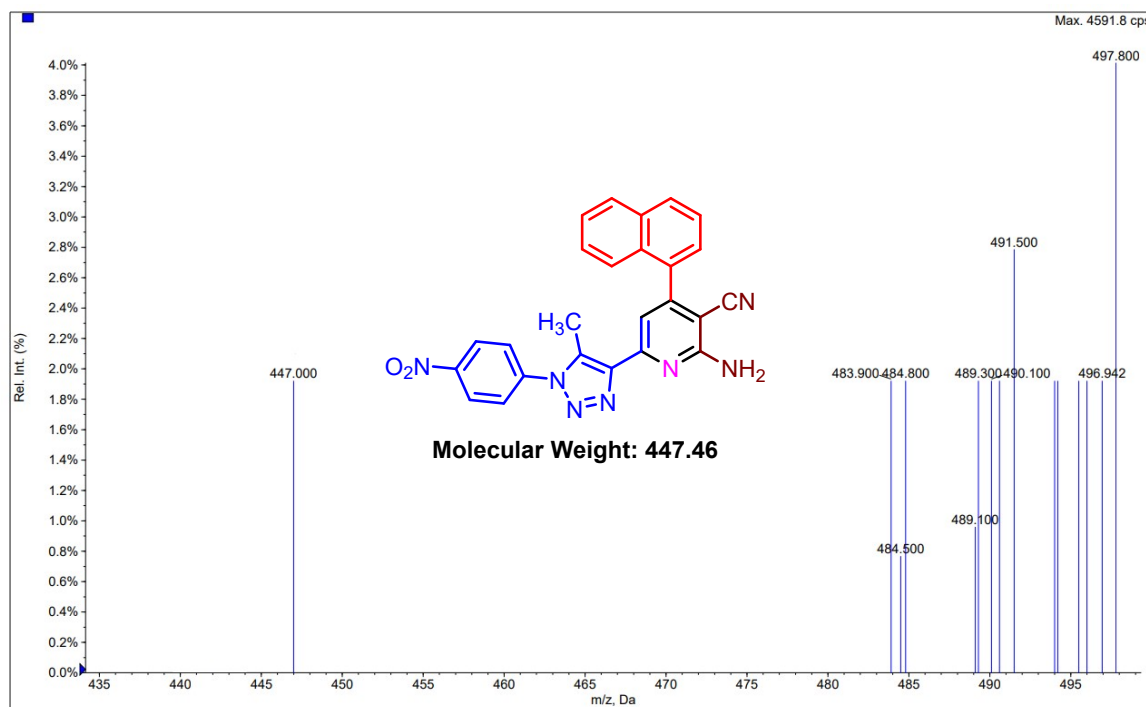

18: FT-IR spectrum of 2-amino-4-(1H-indol-3-yl)-6-(5-methyl-1-(4-nitrophenyl)-1H-1,2,3-triazol-4-yl) nicotinonitrile

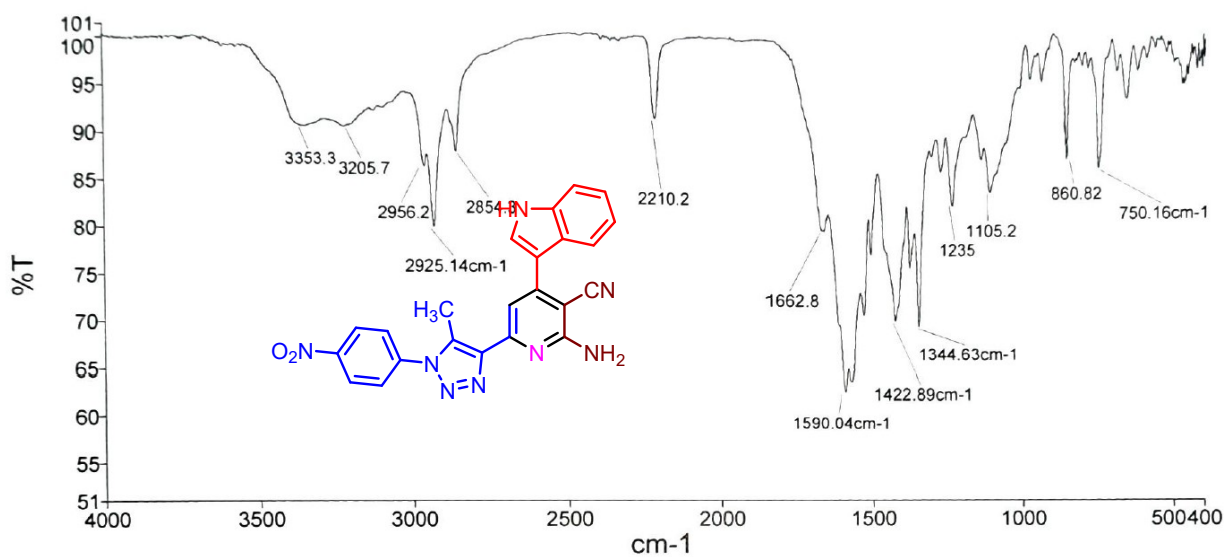

19:  $^1\text{H}$  NMR spectrum of 2-amino-4-(1*H*-indol-3-yl)-6-(5-methyl-1-(4-nitrophenyl)-1*H*-1,2,3-triazol-4-yl) nicotinonitrile

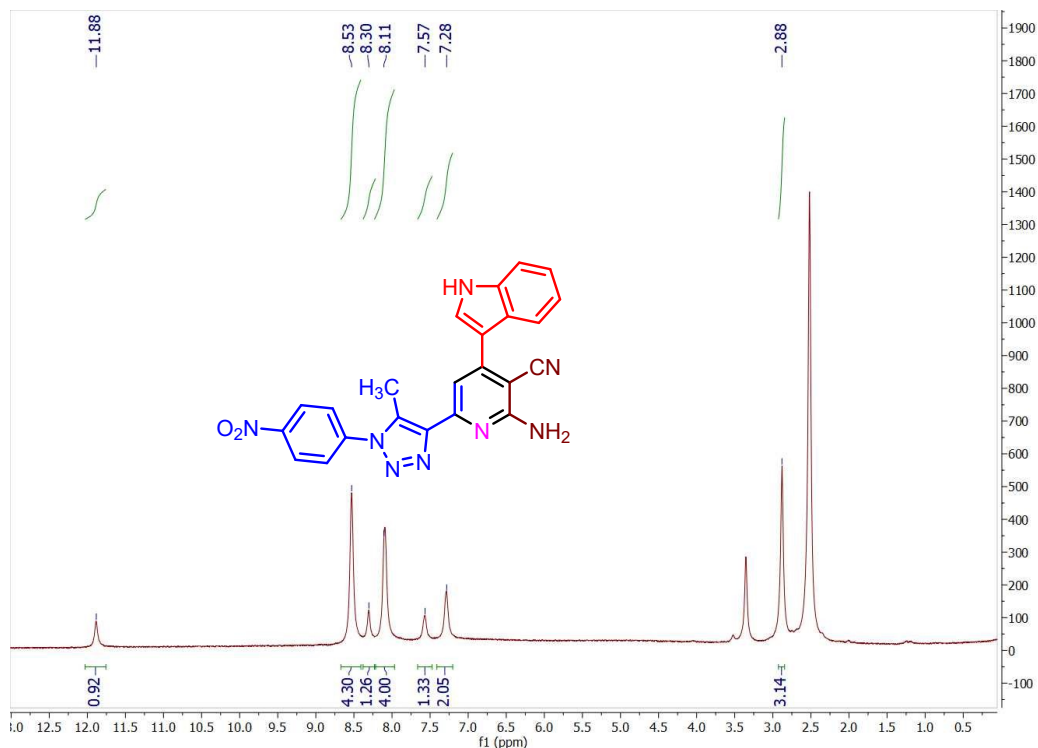

20:  $^{13}\text{C}$  NMR spectrum of 2-amino-4-(1*H*-indol-3-yl)-6-(5-methyl-1-(4-nitrophenyl)-1*H*-1,2,3-triazol-4-yl) nicotinonitrile

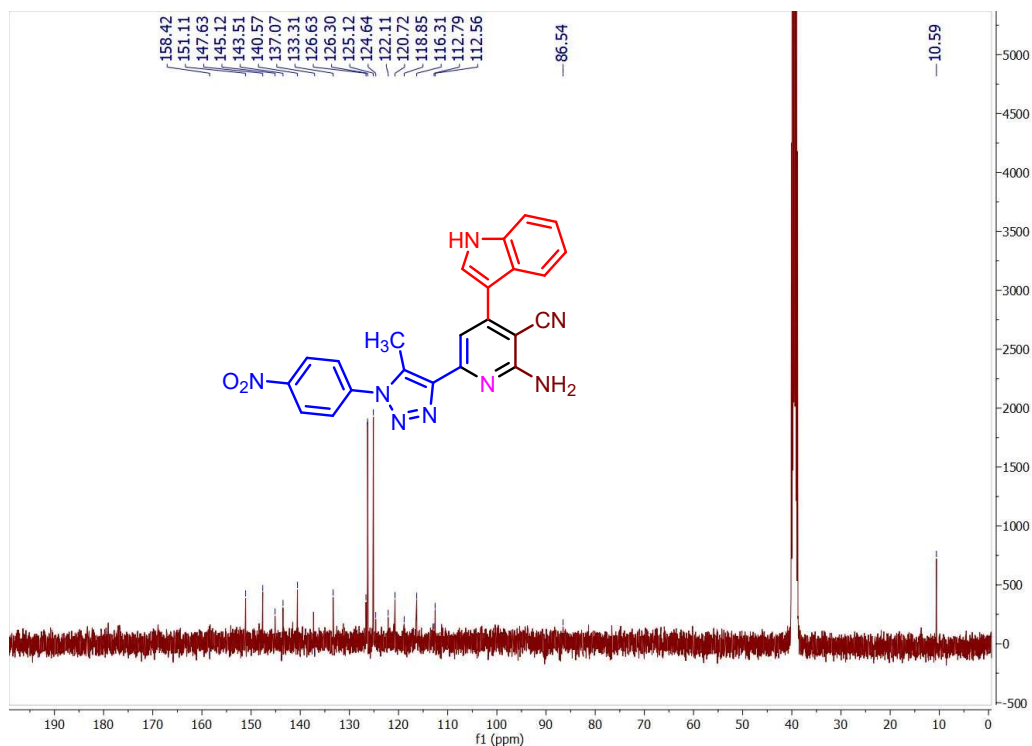

21: FT-IR spectrum of 2-amino-4-(4-chlorophenyl)-6-(5-methyl-1-(4-nitrophenyl)-1*H*-1,2,3-triazol-4-yl) nicotinonitrile

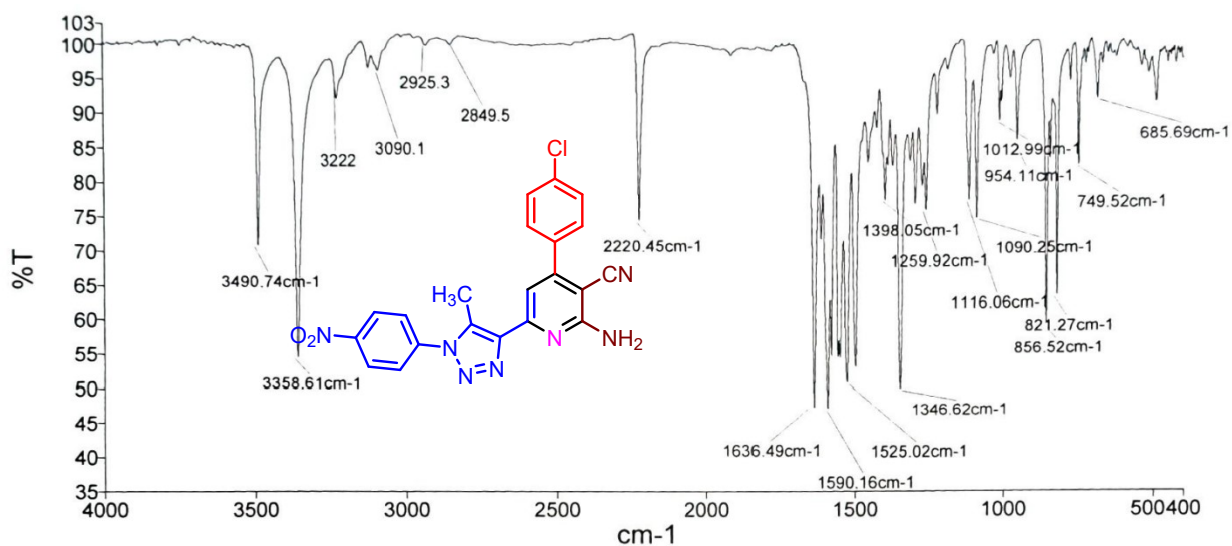

22: <sup>1</sup>H NMR spectrum of 2-amino-4-(4-chlorophenyl)-6-(5-methyl-1-(4-nitrophenyl)-1*H*-1,2,3-triazol-4-yl) nicotinonitrile

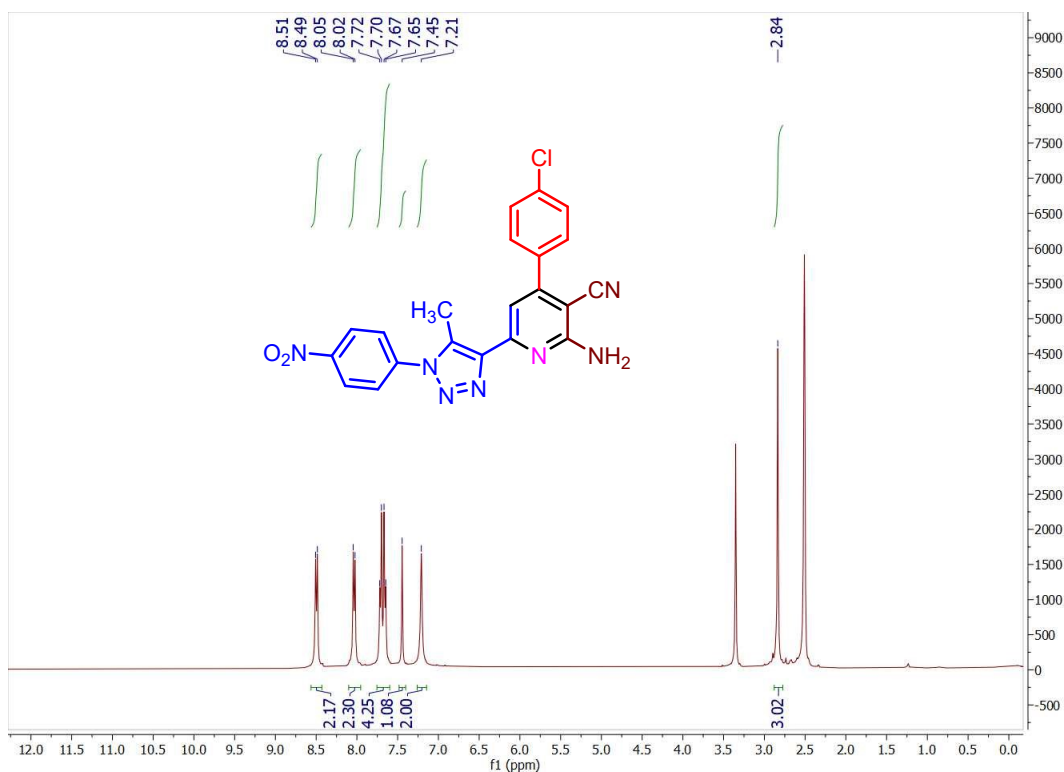

23:  $^{13}\text{C}$  NMR spectrum of 2-amino-4-(4-chlorophenyl)-6-(5-methyl-1-(4-nitrophenyl)-1*H*-1,2,3-triazol-4-yl) nicotinonitrile

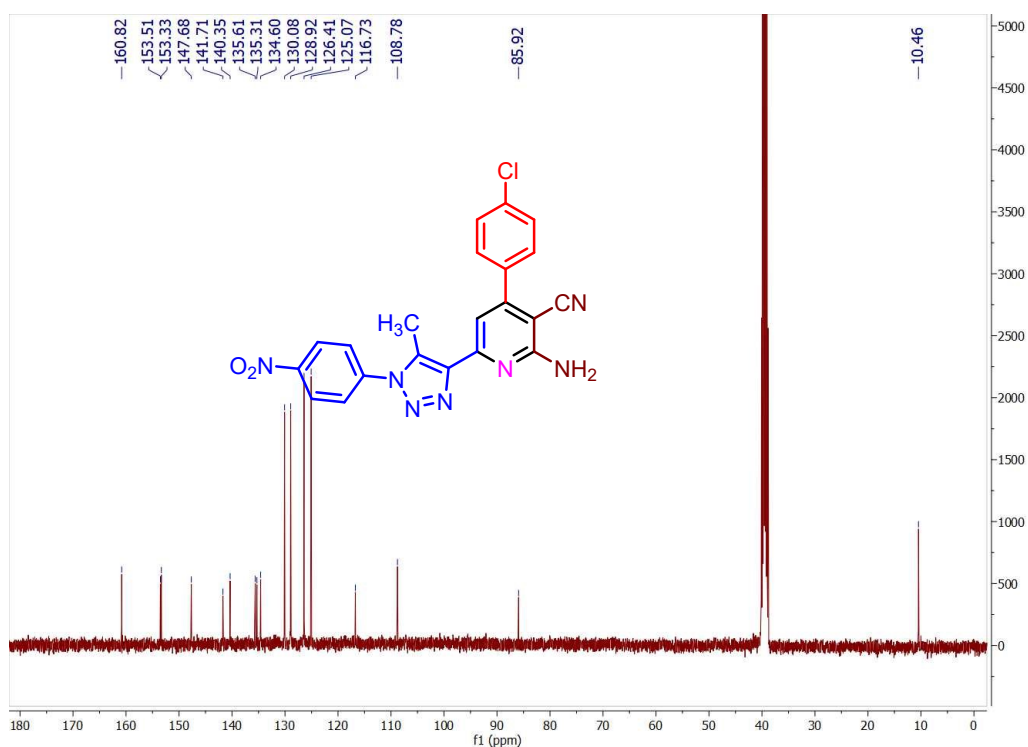

24: Mass spectrum of 2-amino-4-(4-chlorophenyl)-6-(5-methyl-1-(4-nitrophenyl)-1*H*-1,2,3-triazol-4-yl) nicotinonitrile

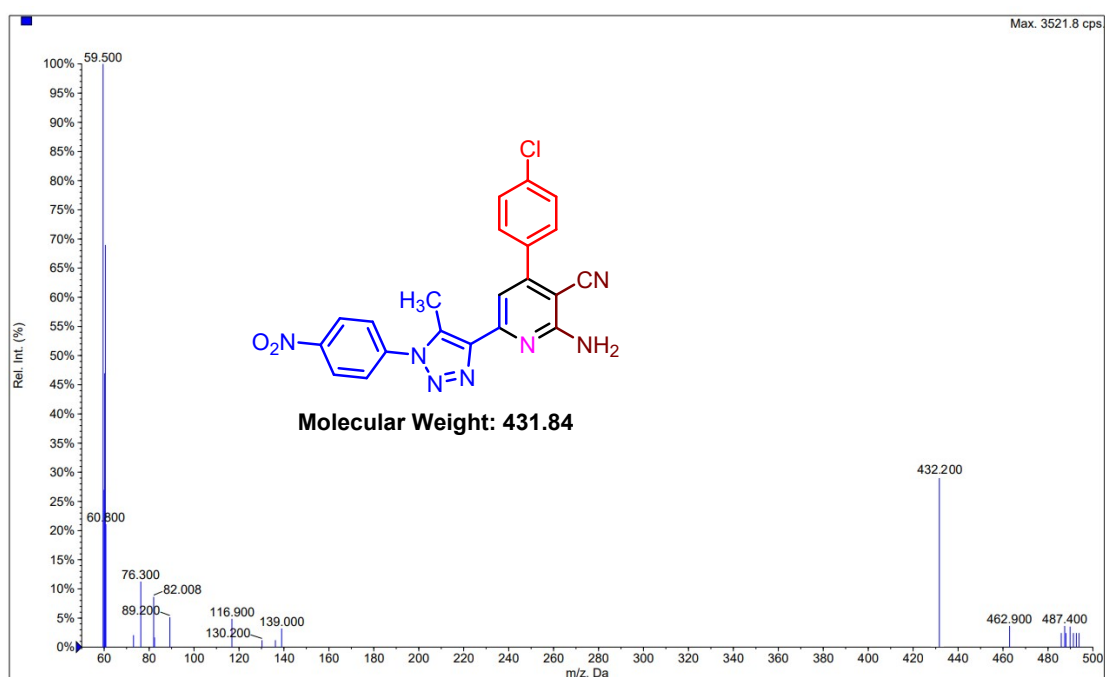



25: FT-IR spectrum of 2-amino-4-(4-bromophenyl)-6-(5-methyl-1-(4-nitrophenyl)-1H-1,2,3-triazol-4-yl) nicotinonitrile

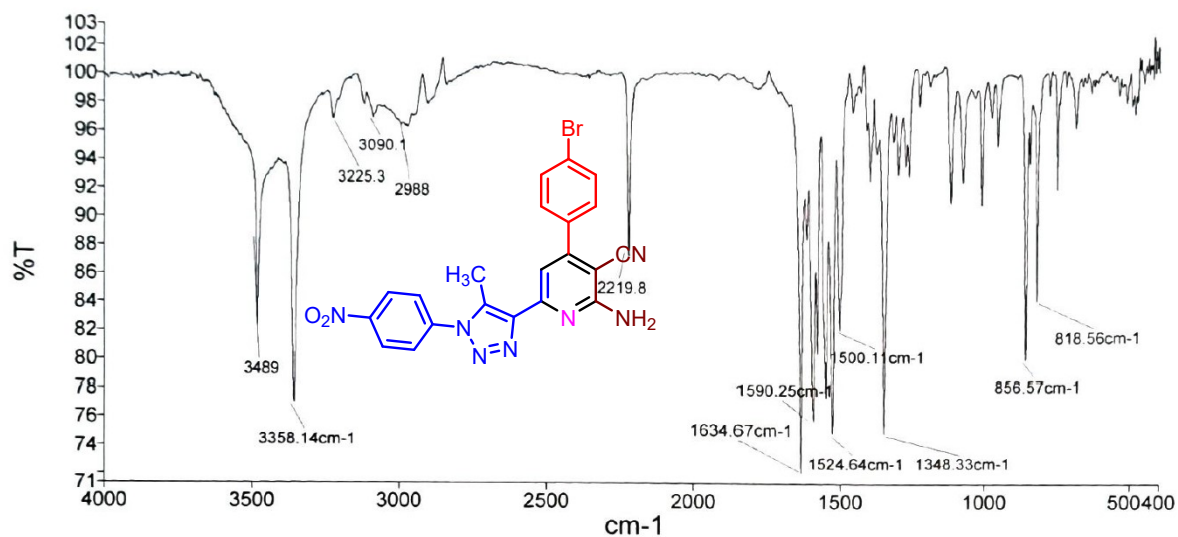

26: <sup>1</sup>H NMR spectrum of 2-amino-4-(4-bromophenyl)-6-(5-methyl-1-(4-nitrophenyl)-1H-1,2,3-triazol-4-yl) nicotinonitrile

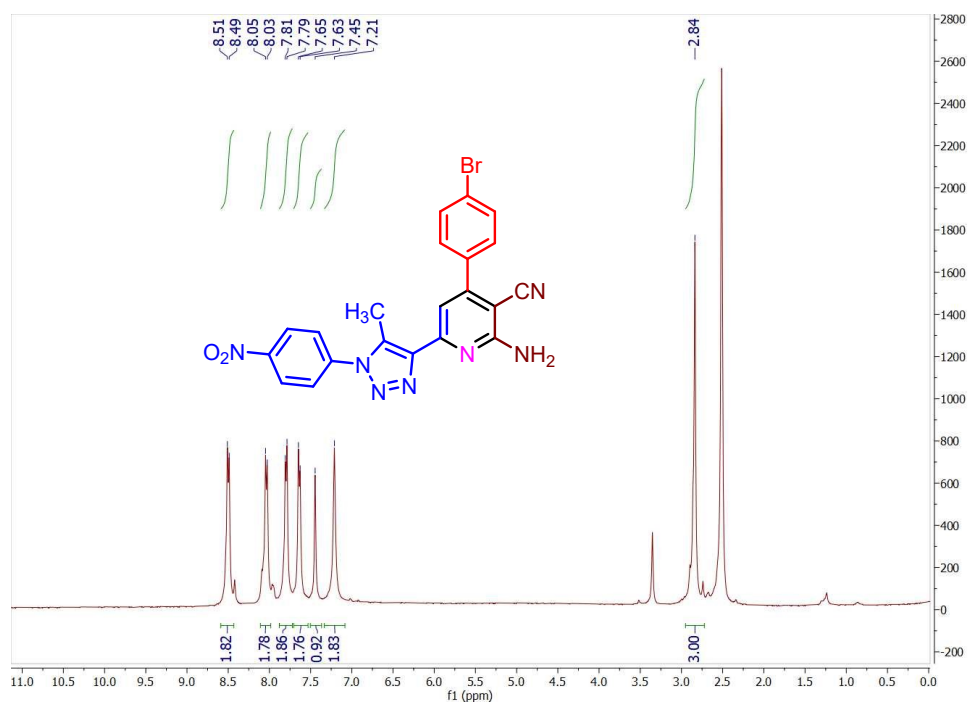

27:  $^{13}\text{C}$  NMR spectrum of 2-amino-4-(4-bromophenyl)-6-(5-methyl-1-(4-nitrophenyl)-1*H*-1,2,3-triazol-4-yl) nicotinonitrile

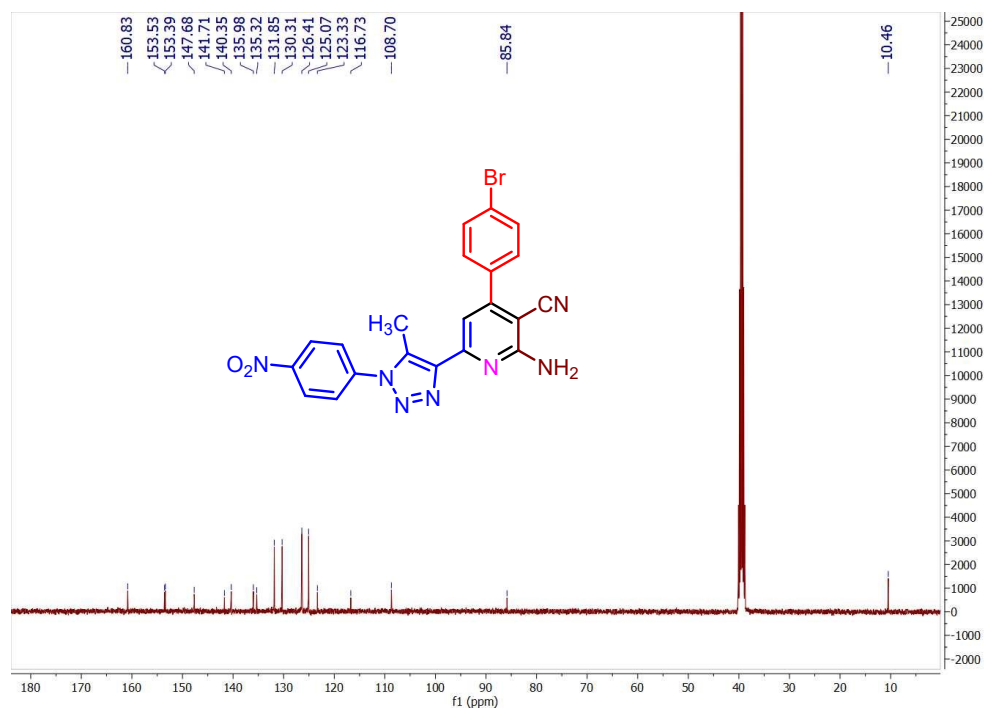

28: Mass spectrum of 2-amino-4-(4-bromophenyl)-6-(5-methyl-1-(4-nitrophenyl)-1*H*-1,2,3-triazol-4-yl) nicotinonitrile

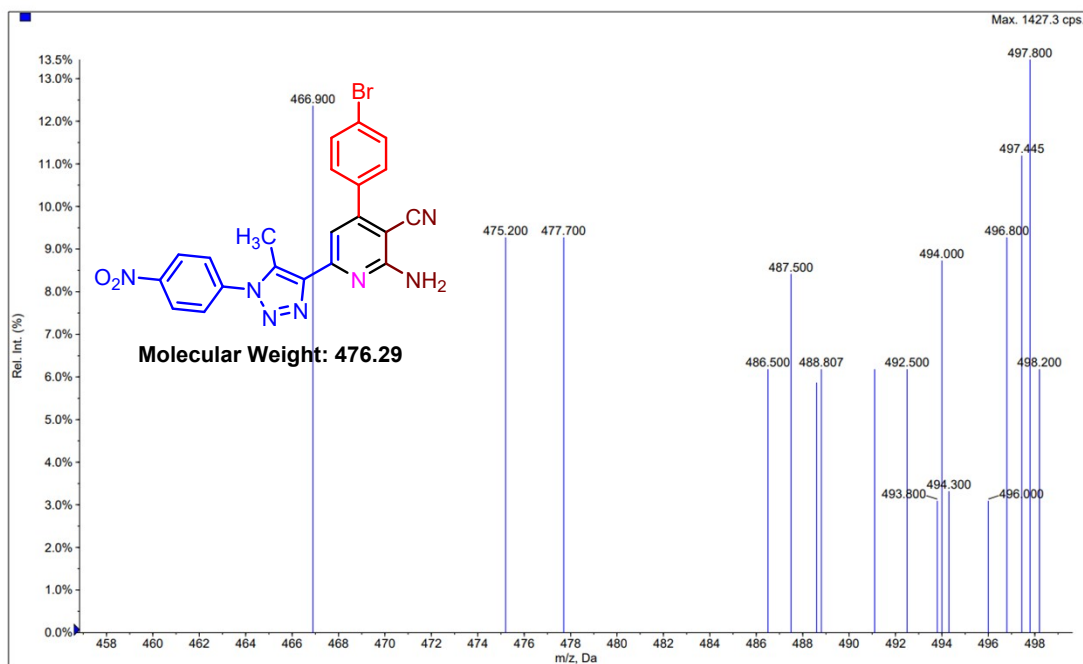

29: FT-IR spectrum of 2-amino-4-(3-bromophenyl)-6-(5-methyl-1-(4-nitrophenyl)-1H-1,2,3-triazol-4-yl) nicotinonitrile

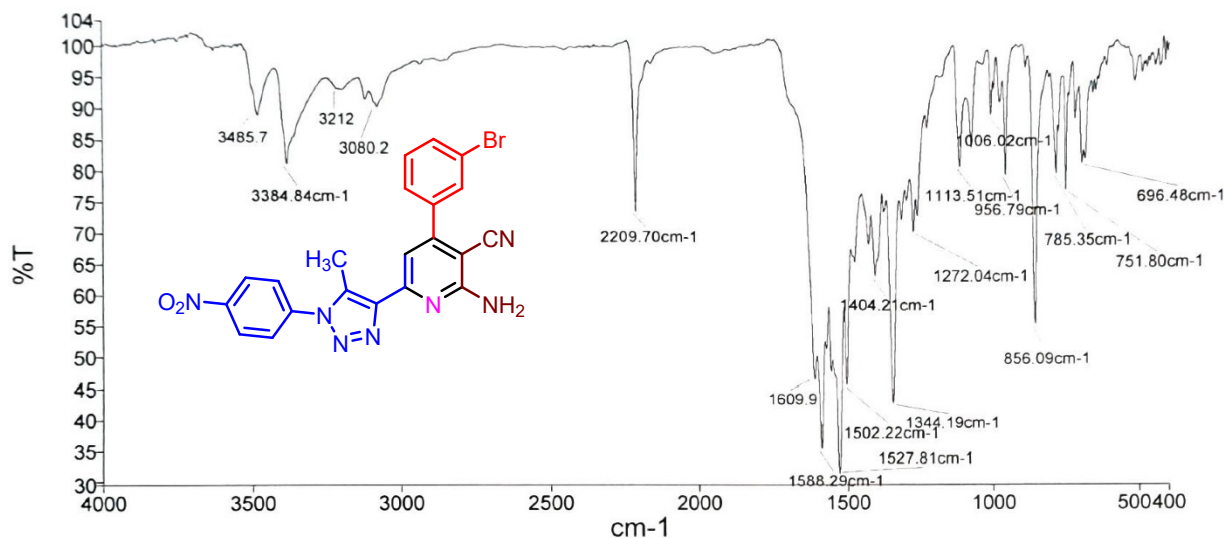

30: <sup>1</sup>H NMR spectrum of 2-amino-4-(3-bromophenyl)-6-(5-methyl-1-(4-nitrophenyl)-1H-1,2,3-triazol-4-yl) nicotinonitrile

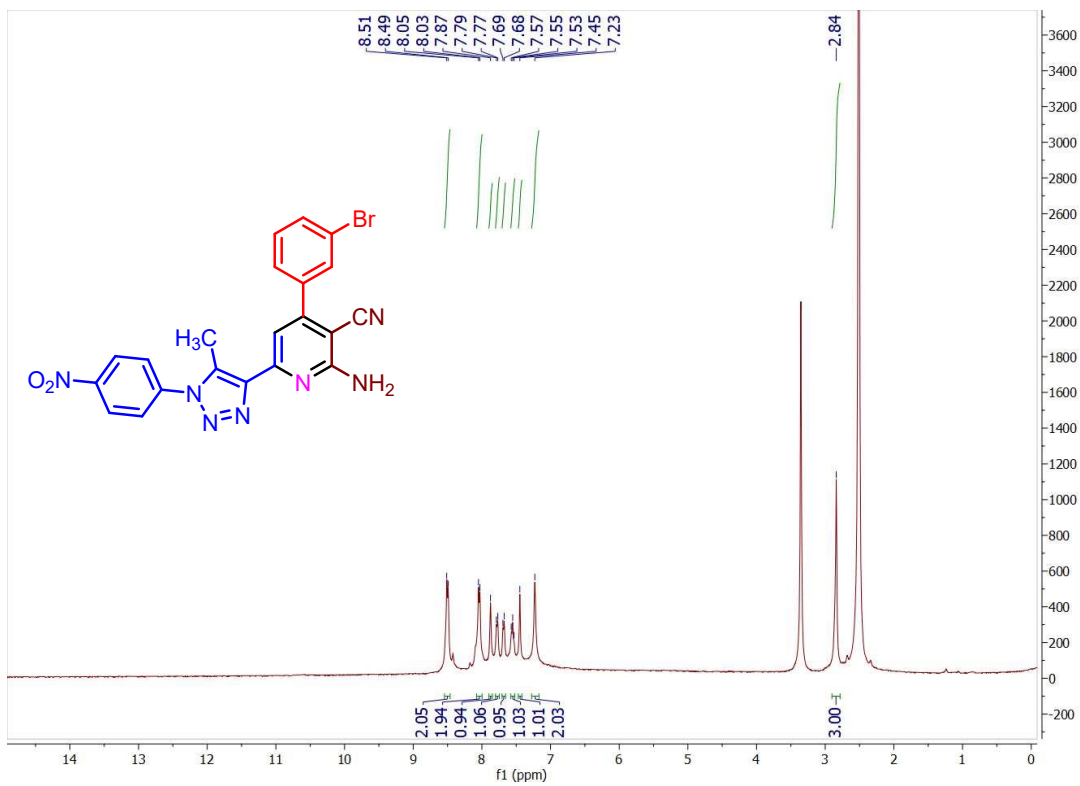

31:  $^{13}\text{C}$  NMR spectrum of 2-amino-4-(3-bromophenyl)-6-(5-methyl-1-(4-nitrophenyl)-1*H*-1,2,3-triazol-4-yl) nicotinonitrile

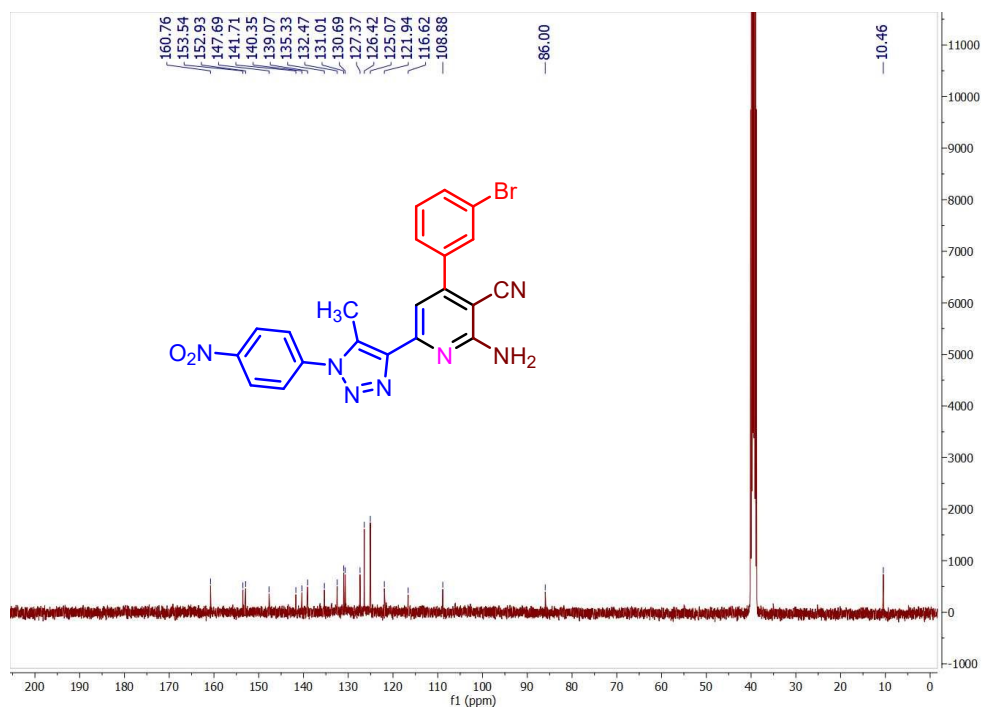

32: Mass spectrum of 2-amino-4-(3-bromophenyl)-6-(5-methyl-1-(4-nitrophenyl)-1*H*-1,2,3-triazol-4-yl) nicotinonitrile

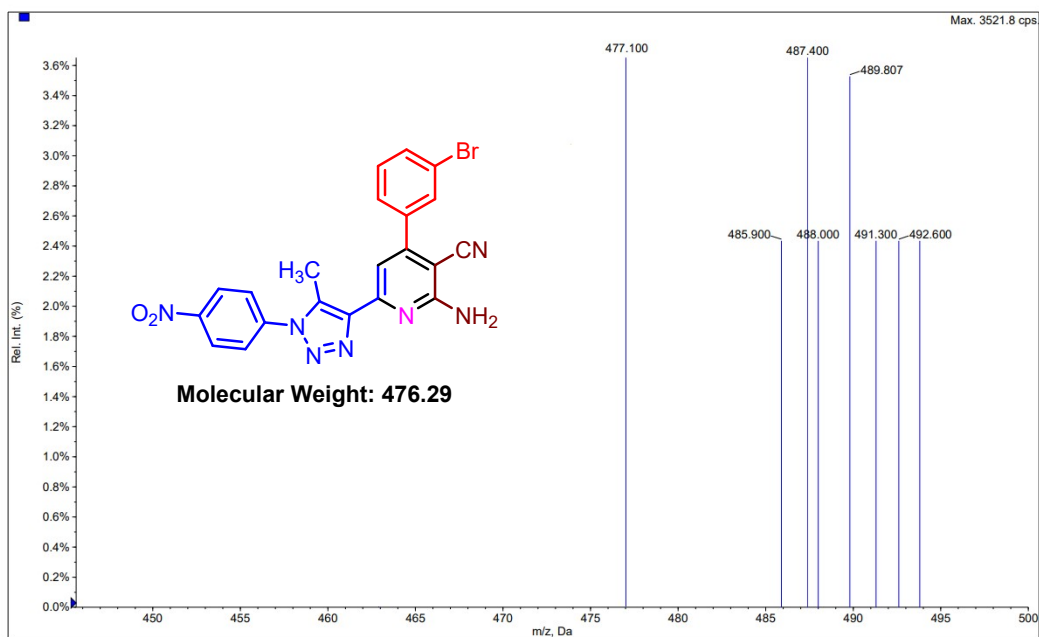

33: <sup>1</sup>H NMR spectrum of 2-amino-4-(4-chloro-3-nitrophenyl)-6-(5-methyl-1-(4-nitrophenyl)-1H-1,2,3-triazol-4-yl) nicotinonitrile

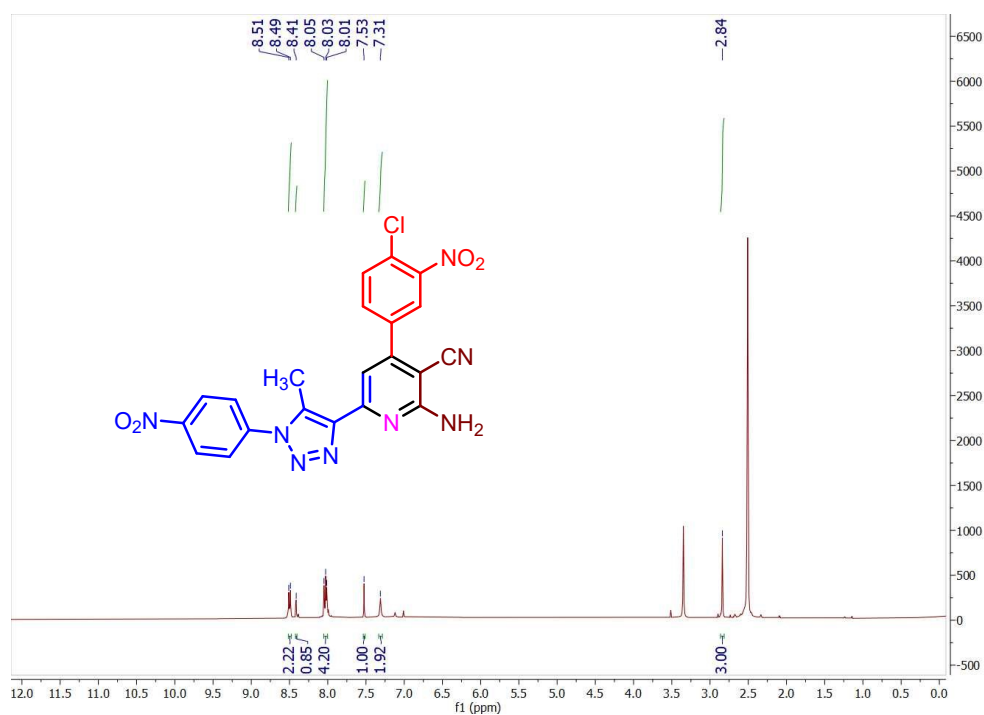

34: <sup>13</sup>C NMR spectrum of 2-amino-4-(4-chloro-3-nitrophenyl)-6-(5-methyl-1-(4-nitrophenyl)-1H-1,2,3-triazol-4-yl) nicotinonitrile

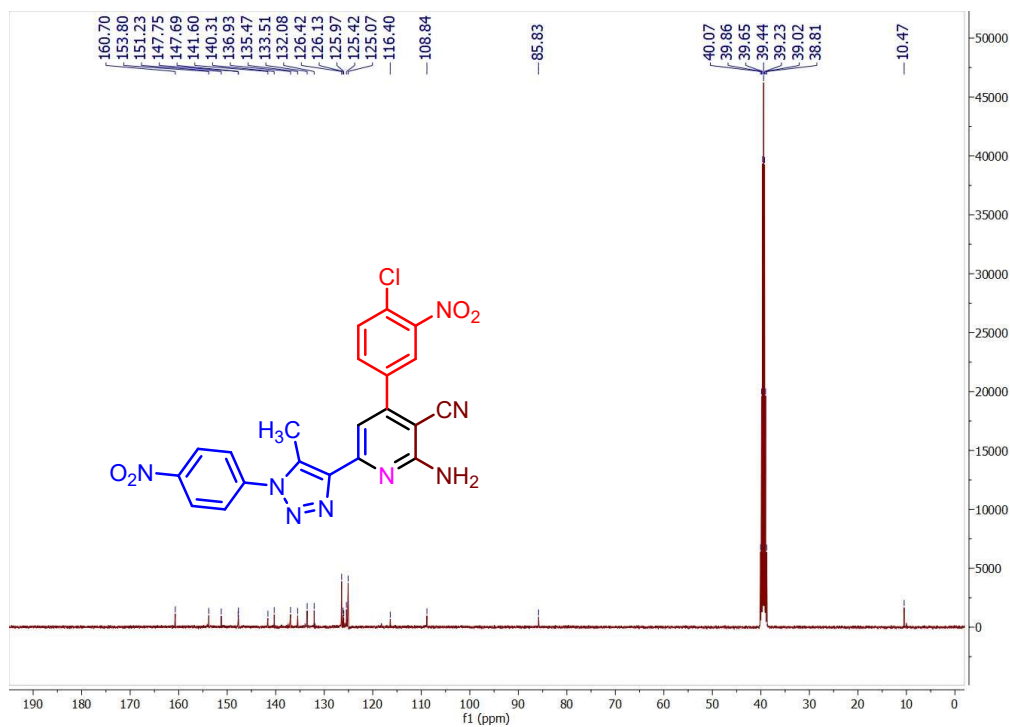

35: Mass spectrum of 2-amino-4-(4-chloro-3-nitrophenyl)-6-(5-methyl-1-(4-nitrophenyl)-1H-1,2,3-triazol-4-yl) nicotinonitrile

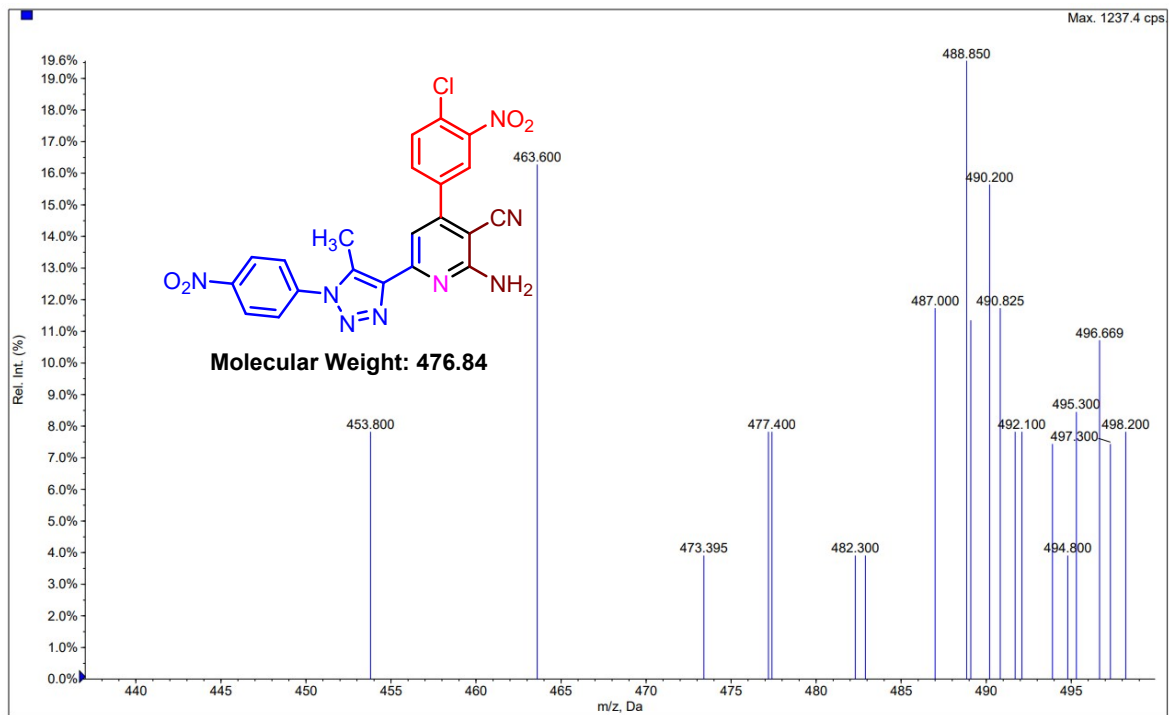

36: FT-IR spectrum of 2-amino-4-(4-fluorophenyl)-6-(5-methyl-1-(4-nitrophenyl)-1H-1,2,3-triazol-4-yl) nicotinonitrile

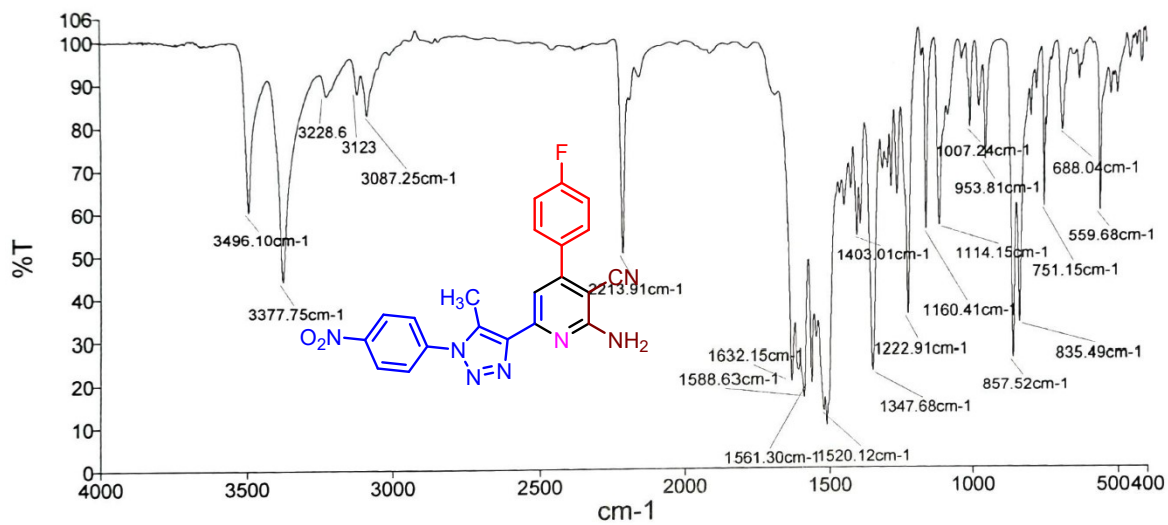

37:  $^1\text{H}$  NMR spectrum of 2-amino-4-(4-fluorophenyl)-6-(5-methyl-1-(4-nitrophenyl)-1*H*-1,2,3-triazol-4-yl) nicotinonitrile

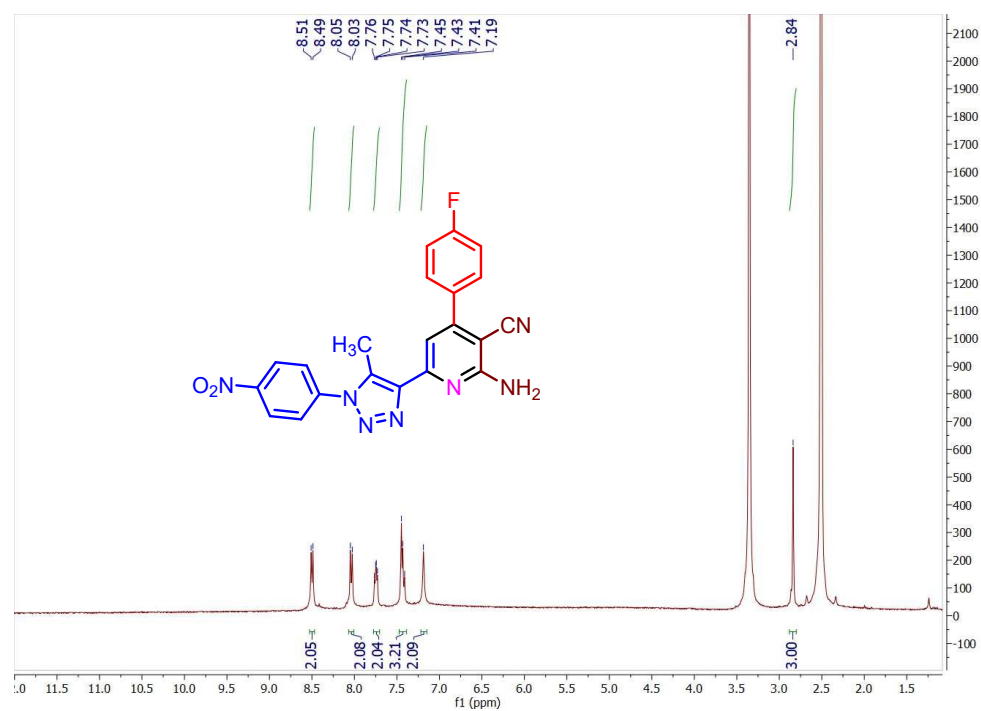

38:  $^{13}\text{C}$  NMR spectrum of 2-amino-4-(4-fluorophenyl)-6-(5-methyl-1-(4-nitrophenyl)-1*H*-1,2,3-triazol-4-yl) nicotinonitrile

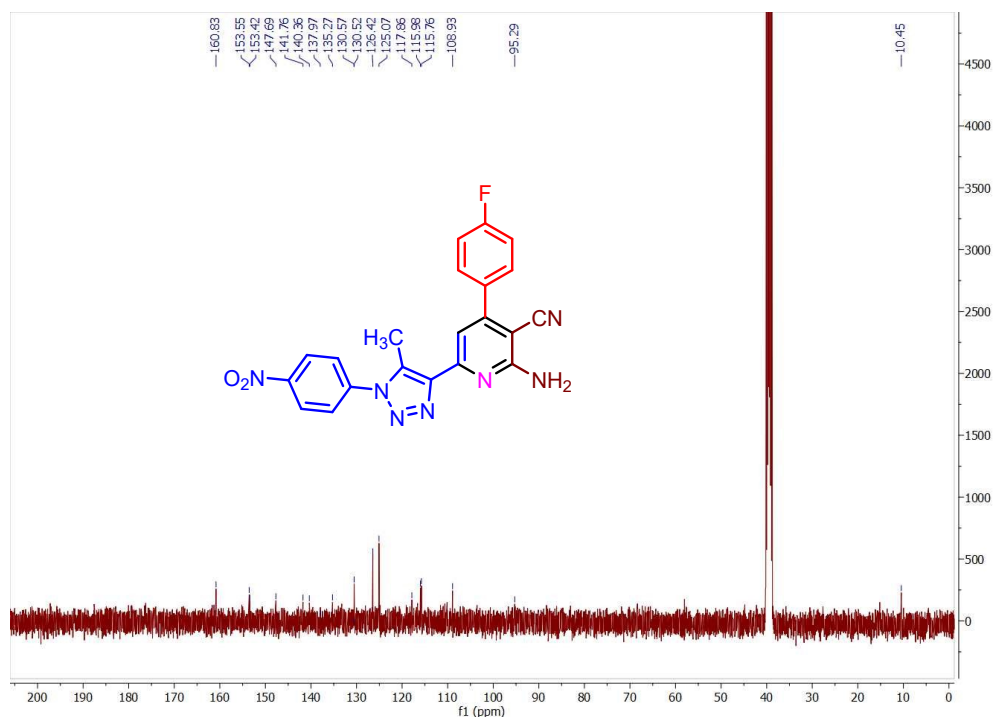

39: Mass spectrum of 2-amino-4-(4-fluorophenyl)-6-(5-methyl-1-(4-nitrophenyl)-1H-1,2,3-triazol-4-yl) nicotinonitrile

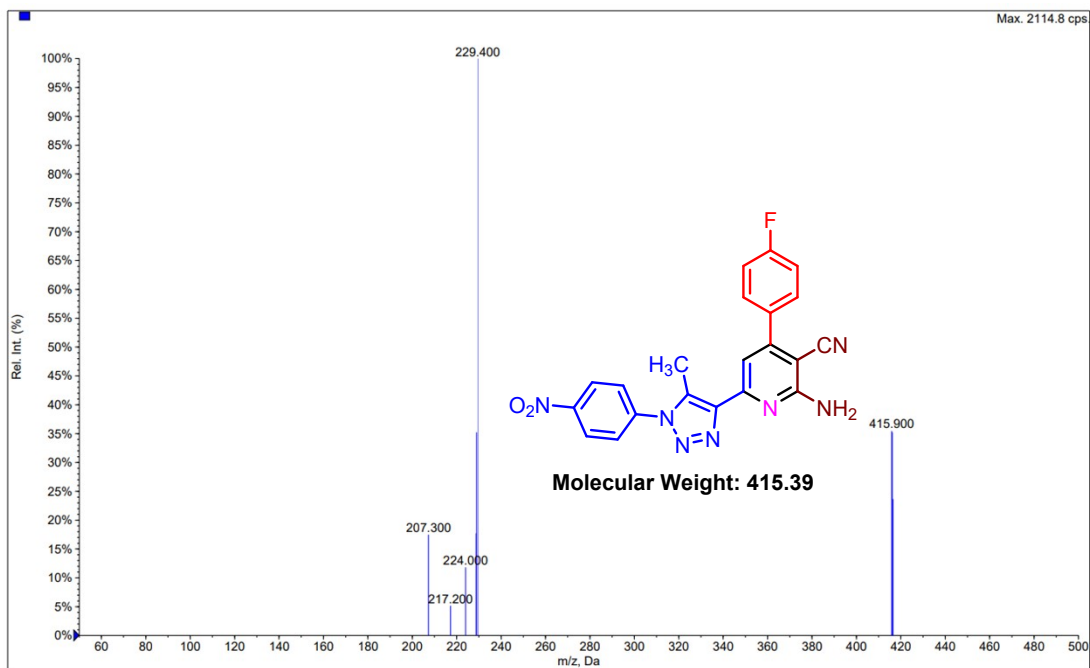

40: FT-IR spectrum of 2-amino-4-(2-fluorophenyl)-6-(5-methyl-1-(4-nitrophenyl)-1H-1,2,3-triazol-4-yl) nicotinonitrile

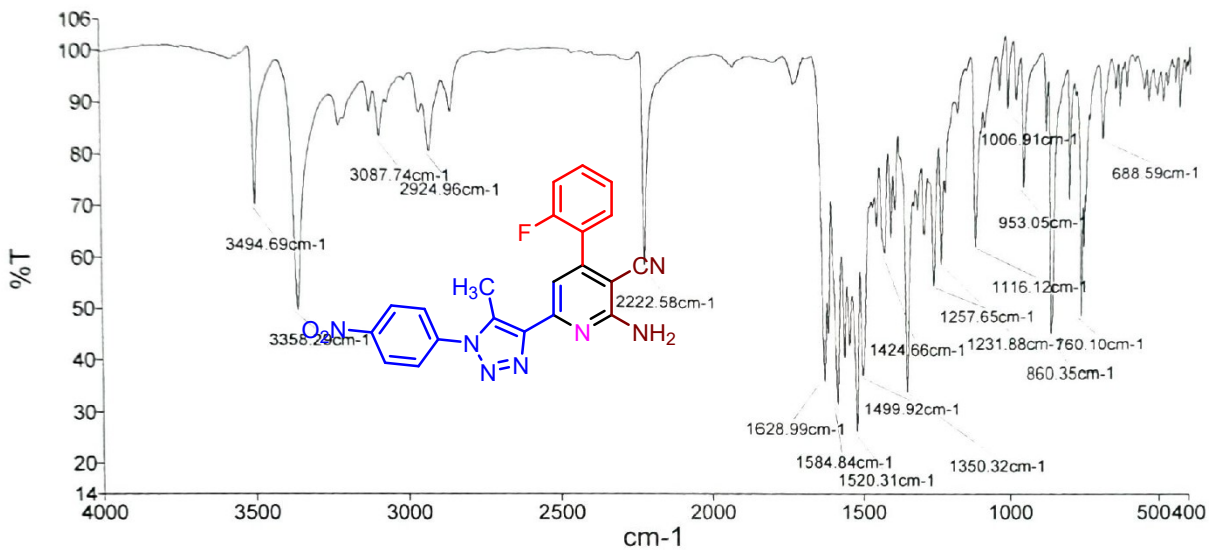



41:  $^1\text{H}$  NMR spectrum of 2-amino-4-(2-fluorophenyl)-6-(5-methyl-1-(4-nitrophenyl)-1*H*-1,2,3-triazol-4-yl) nicotinonitrile

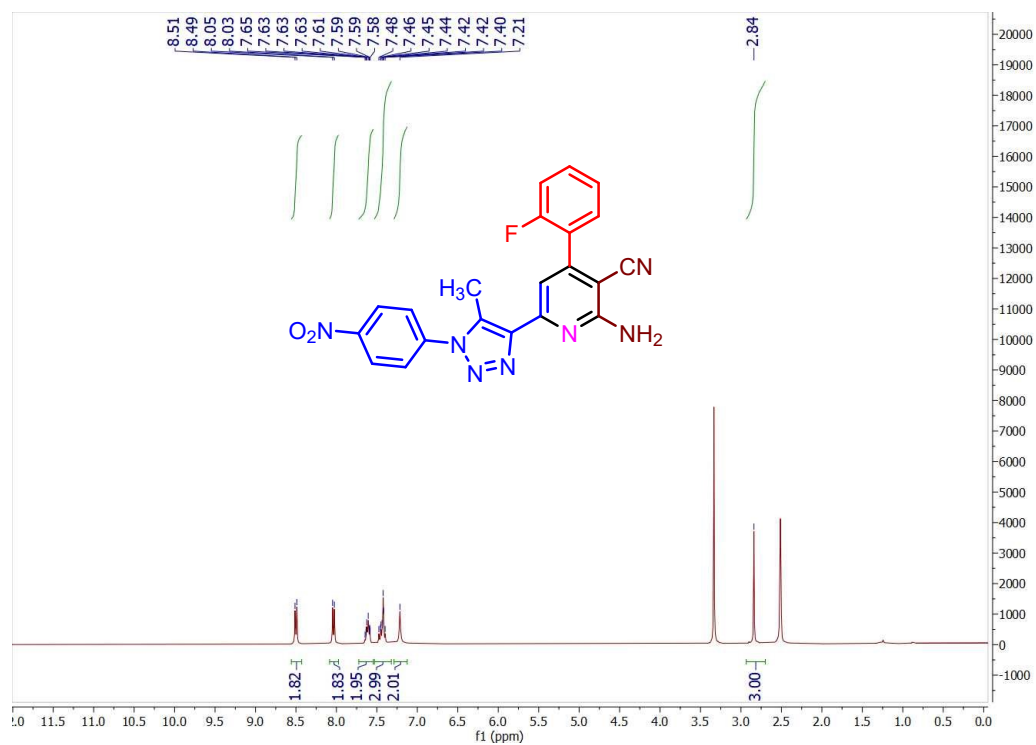

42:  $^{13}\text{C}$  NMR spectrum of 2-amino-4-(2-fluorophenyl)-6-(5-methyl-1-(4-nitrophenyl)-1*H*-1,2,3-triazol-4-yl) nicotinonitrile

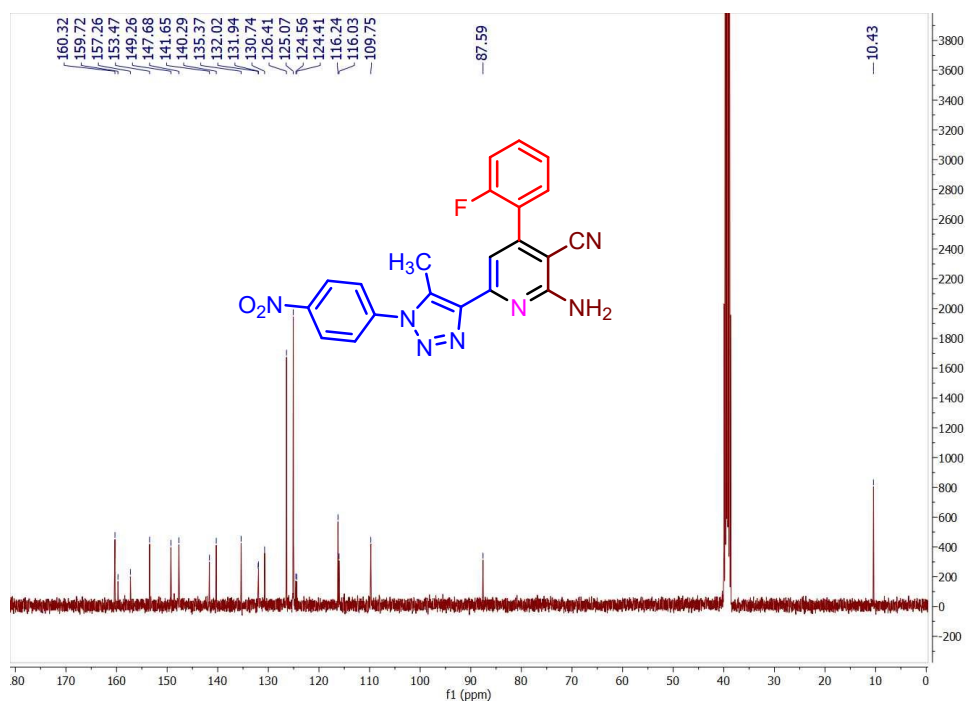

43: Mass spectrum of 2-amino-4-(2-florophenyl)-6-(5-methyl-1-(4-nitrophenyl)-1H-1,2,3-triazol-4-yl) nicotinonitrile

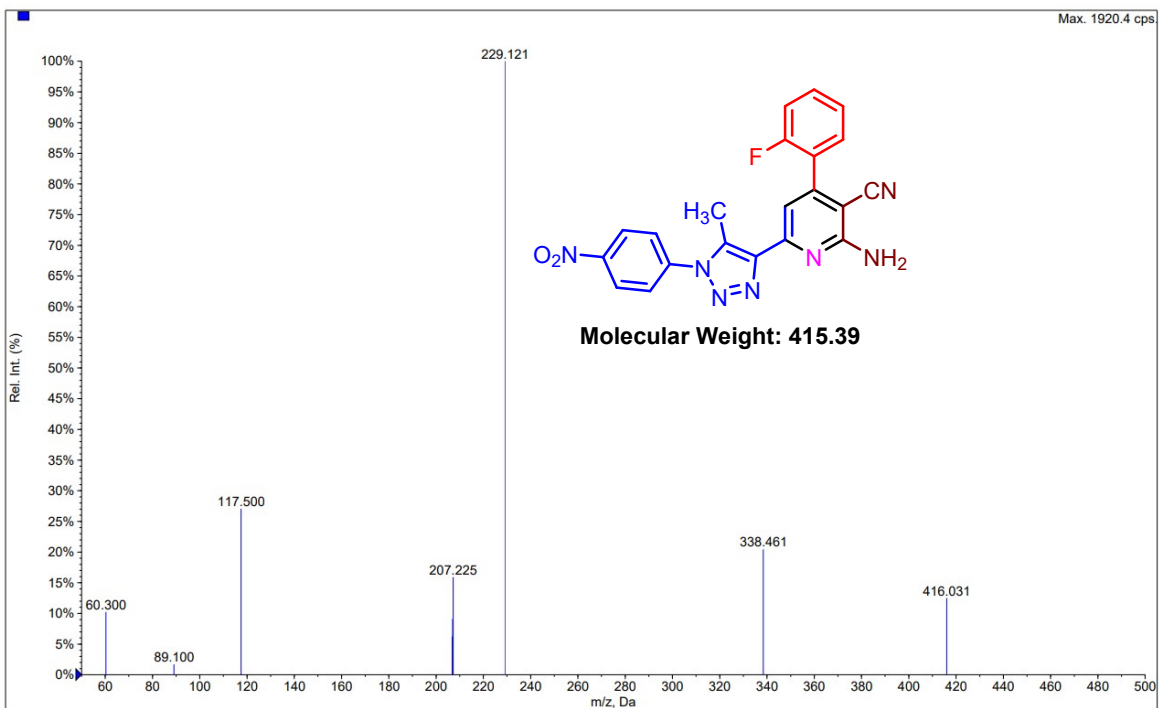

44: FT-IR spectrum of 2-amino-6-(5-methyl-1-(4-nitrophenyl)-1H-1,2,3-triazol-4-yl)-4-(4-nitrophenyl) nicotinonitrile

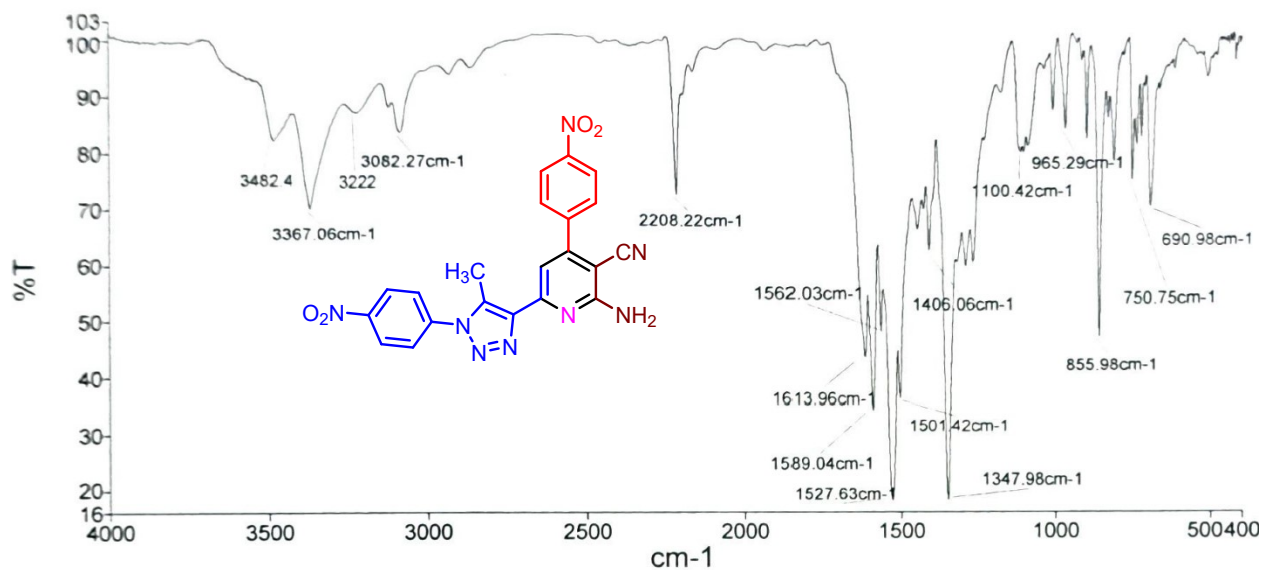

45:  $^1\text{H}$  NMR spectrum of 2-amino-6-(5-methyl-1-(4-nitrophenyl)-1H-1,2,3-triazol-4-yl)-4-(4-nitrophenyl) nicotinonitrile

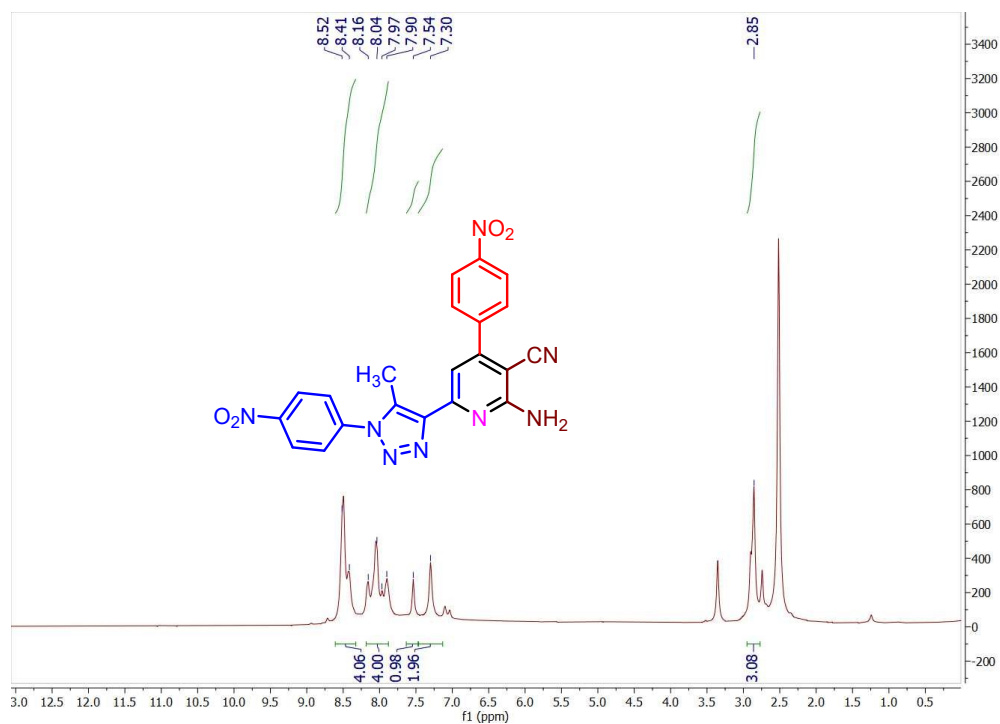

46:  $^{13}\text{C}$  NMR spectrum of 2-amino-6-(5-methyl-1-(4-nitrophenyl)-1H-1,2,3-triazol-4-yl)-4-(4-nitrophenyl) nicotinonitrile

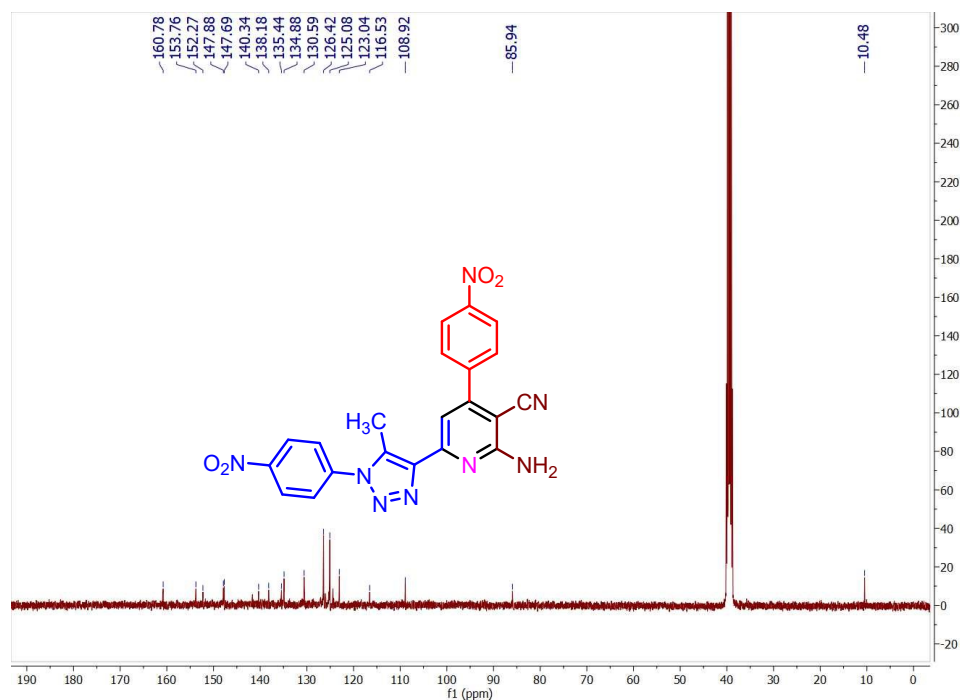

47: Mass spectrum of 2-amino-6-(5-methyl-1-(4-nitrophenyl)-1H-1,2,3-triazol-4-yl)-4-(4-nitrophenyl) nicotinonitrile

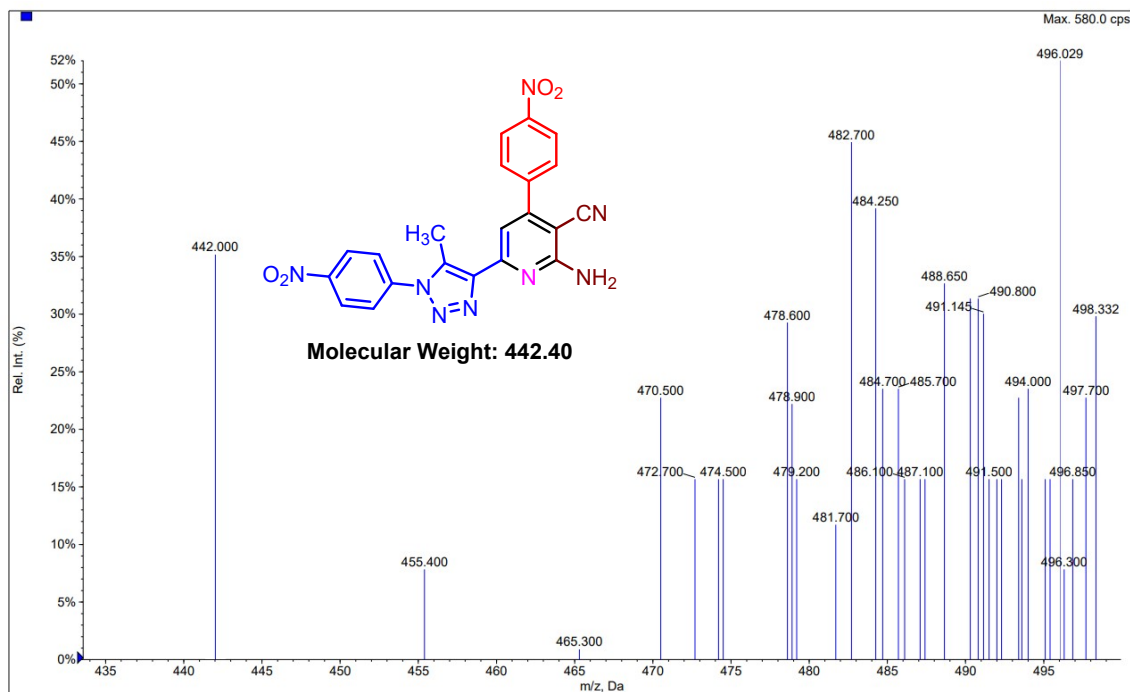

48: FT-IR spectrum of 2-amino-4-(4-cyanophenyl)-6-(5-methyl-1-(4-nitrophenyl)-1H-1,2,3-triazol-4-yl) nicotinonitrile

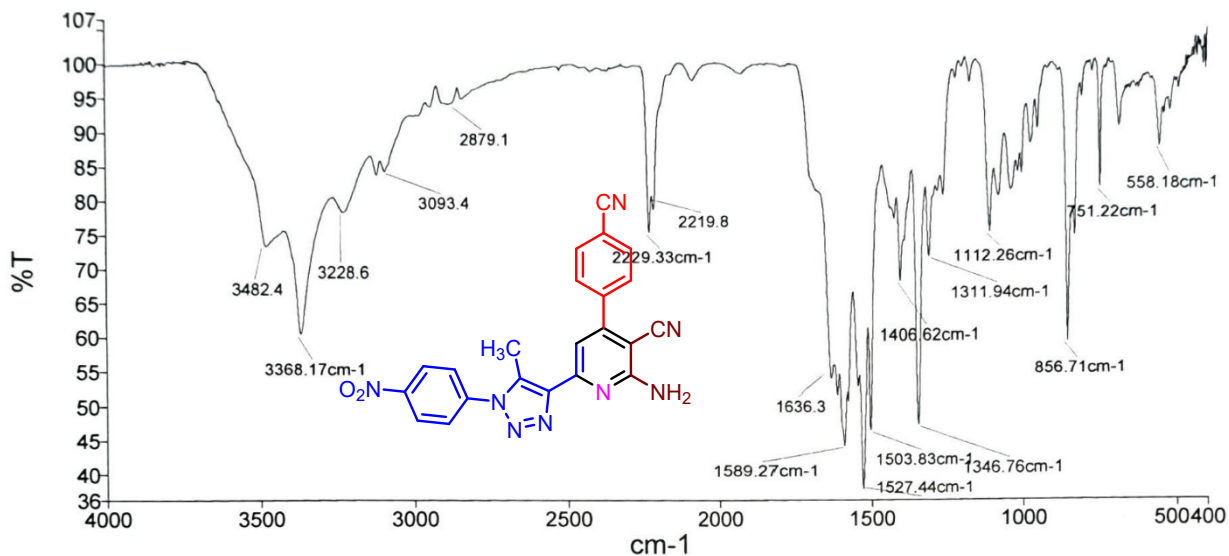

49: <sup>1</sup>H NMR spectrum of 2-amino-4-(4-cyanophenyl)-6-(5-methyl-1-(4-nitrophenyl)-1*H*-1,2,3-triazol-4-yl) nicotinonitrile

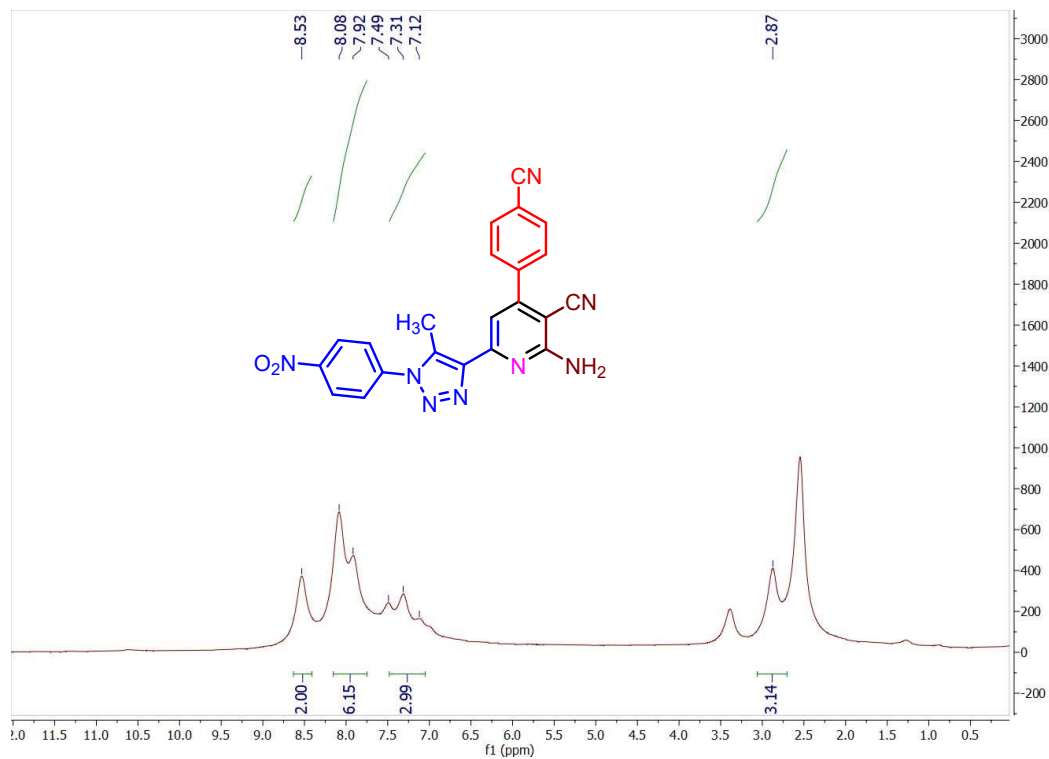

50: <sup>13</sup>C NMR spectrum of 2-amino-4-(4-cyanophenyl)-6-(5-methyl-1-(4-nitrophenyl)-1*H*-1,2,3-triazol-4-yl) nicotinonitrile

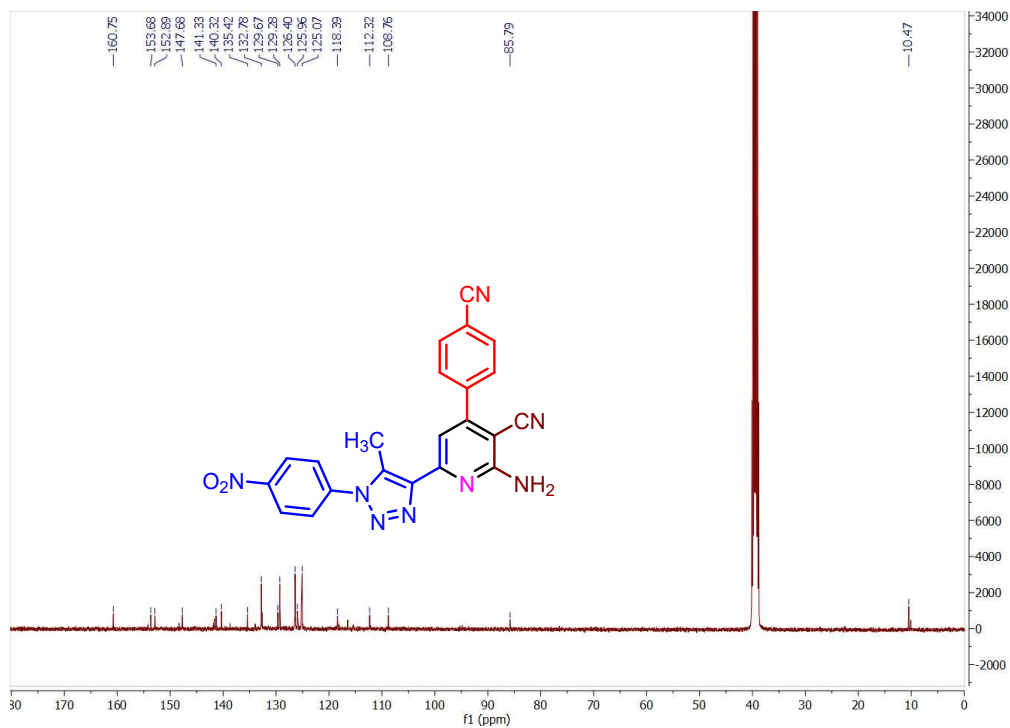

51: EDS signals of recovered  $\text{Fe}_3\text{O}_4@\text{SiO}_2@\text{DES1}$

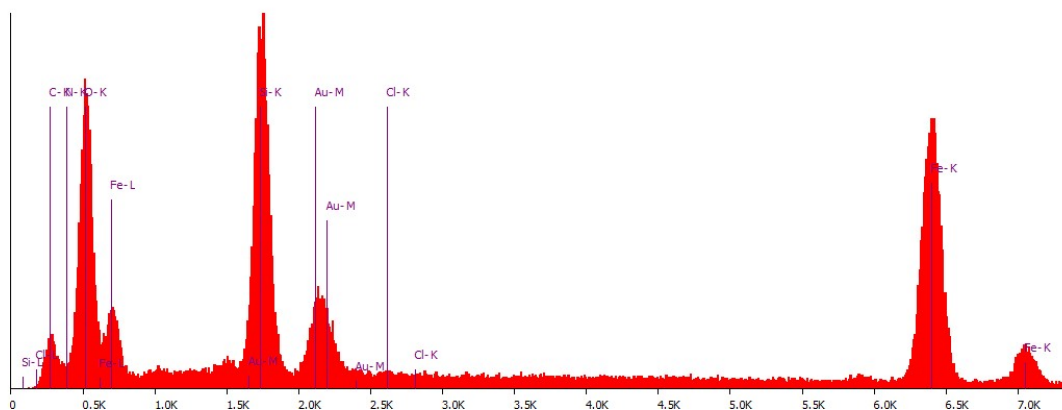

52: Mapping analysis of recovered  $\text{Fe}_3\text{O}_4@\text{SiO}_2@\text{DES1}$

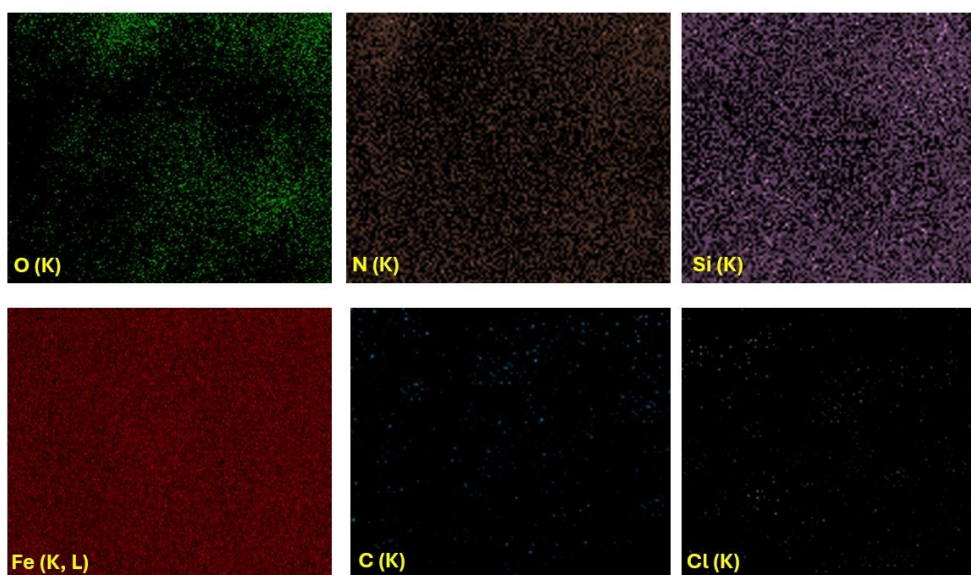

53: FESEM images of recovered  $\text{Fe}_3\text{O}_4@\text{SiO}_2@\text{DES1}$

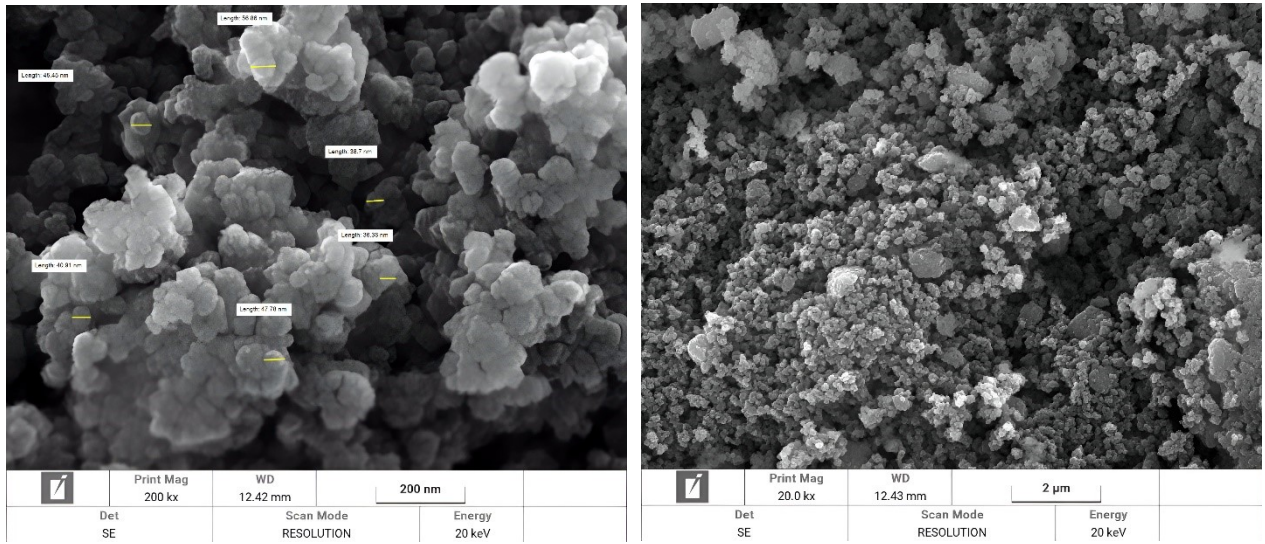

54: XRD pattern of recovered  $\text{Fe}_3\text{O}_4@\text{SiO}_2@\text{DES1}$

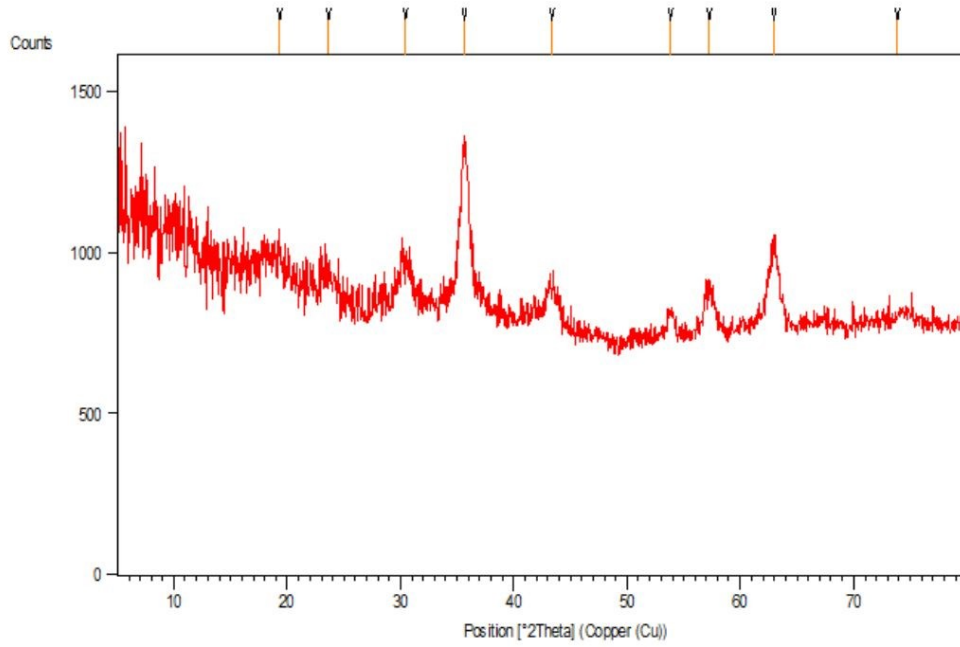

55: The N<sub>2</sub> adsorption-desorption isotherms of Fe<sub>3</sub>O<sub>4</sub>@SiO<sub>2</sub>@DES1 (a) and recovered Fe<sub>3</sub>O<sub>4</sub>@SiO<sub>2</sub>@DES1 (b)

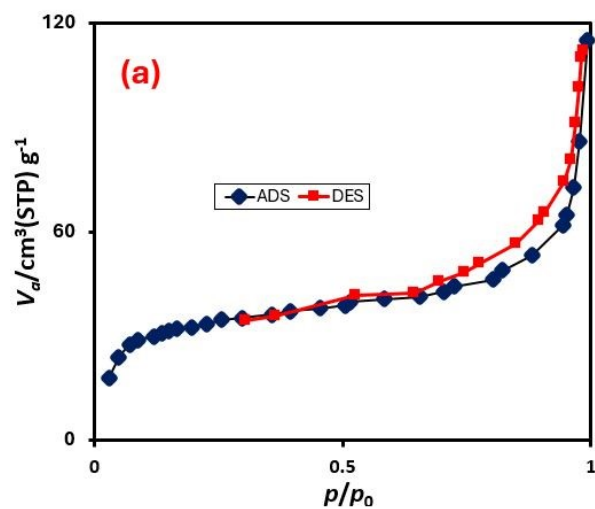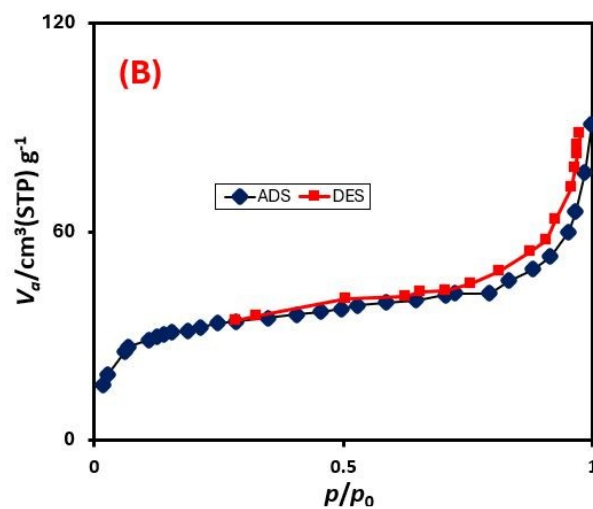

Supplement: d4ra05177g1.pdf [file d4ra05177g1.pdf]
